# Supplementary material
Source: publisher figshare collection journal article supplement (https://geolsoc.figshare.com/ndownloader/files/14744600)
Supplement: Supplementary file 1 [file 14744600]

## Sheet: Characters + codings
	Characters	0	1	2	3	4	5	Ordering	State	Original Authors (coding)	Used by authors	Herrerasaurus	Daemonosaurus	Eodromaeus	Eoraptor	Dracovenator	Coelophysis	Liliensternus	Dilophosaurus	Ceratosaurus	Genyodectes	Berberosaurus	Limusaurus_juvenile	Limusaurus_adult	Noasaurus	Masiakasaurus	Kryptops	Rugops	Abelisaurus	Aucasaurus	Indosuchus	Majungasaurus	Skorpiovenator	Chilesaurus	Piatnitzkysaurus	Marshosaurus	Monolophosaurus	Sciuruminus	Eustreptospondylus	Afrovenator	Dubreuillosaurus	Duriavenator	Megalosaurus	Torvosaurus	Baryonyx	Suchomimus	Irritator/Angaturama	Spinosaurus	Erectopus
I.	PREMAXILLA ALVEOLI/TEETH											1	2	3	4	5	6	7	8	9	10	11	12	13	14	15	16	17	18	19	20	21	22	23	24	25	26	27	28	29	30	31	32	33	34	35	36	37	38
1	Premaxillary teeth:	present in the anterior and posterior portions of the premaxilla	absent in the posterior portion of the premaxilla	absent in the anterior portion of the premaxilla	absent in the whole premaxilla, toothless premaxilla			Ordered	Modified	Modified from Russel & Dong, 1993 #2	Forster et al., 1998 #1; Makovicky & Sues, 1998#1; Norell et al., 2001 #82 ; Chiappe, 2001 #4 ; Xu et al., 2002 #61 ; Rauhut, 2003 #81 ; Makovicky et al., 2004 #81 ; Hwang et al., 2004 #81 ; Xu & Norell, 2004 #81 ; Kirkland et al., 2005 #81 ; Makovicky et al., 2005 # 80 ; Turner et al., 2007 #80 ; Zhang et al., 2008 #81 ; Zanno et al., 2009 #80 ; Li et al., 2009 #80 ; Choiniere et al., 2010 #158	0	0	0	0	0	0	?	0	0	0	?	[12]	3	?	0	?	0	0	0	0	0	0	0	?	0	0	0	0	?	0	0	0	0	0	0	0	0	?
2	Number of premaxillary teeth (or alveoli):	3 or less	4	5	6	7 or more		Ordered	Modified	Modified from Harris, 1998 #47 ; Sereno et al., 1998 #19	Rauhut, 2003 #5 ; Smith et al., 2007-2008 #8 ; Sereno & Brusatte, 2008 #36 ; Benson, 2009 #83 ; Choiniere et al., 2010 #159	4/1	0	4/1	4/1	4/1	4/1	?	4/1	3/0	4/1	?	1/0	-	?	?	?	4/1	4/1	4/1	4/1	4/1	4/1	4/1	?	4/1	1	4/1	4/1	?	4/1	?	?	3/0	6-7/[34]	7/4	7/4	6/3	?
3	Premaxillary alveoli, direction of main axis of elongation in palatal view:	all alveoli mesio-distally oriented	anterior alveoli labio-lingually oriented, posterior alveoli mesio-distally oriented	all alveoli labio-lingually oriented				Unordered	New	New		0	?	?	0	1	0	?	1	1	1	?	-	-	?	1	?	0	?	?	0	0	?	?	?	1	?	?	1	?	1	1	?	1	1	1	1	1	?
4	Premaxillary alveoli, overlap of the first and second alveoli in palatal view:	absent	present, partial	present, almost complete				Ordered	New	New		0	0	?	1	1	?	?	1	1	1	?	-	-	?	1	?	0	0	0	0	0	?	?	?	1	?	1	1	?	1	1	?	1	1	1	0	2	?
5	Premaxillary alveoli, overlap of the second and third alveoli in palatal view:	absent	present						New	New		0	0	?	0	1	0	?	0	1	1	?	-	-	?	?	?	0	0	0	0	0	?	?	?	1	0	0	1	?	1	?	?	1	1	1	0	[01]	?
6	Premaxillary alveoli, overlap of the third and fourth alveoli in palatal view:	absent	present						New	New		0	0	?	0	0	0	?	0	9	1	?	-	-	?	?	?	0	0	0	0	0	?	?	?	0	0	0	0	?	0	?	?	9	0	0	0	0	?
7	Premaxillary teeth (or alveoli), size:	all approximately equal in size	posterior teeth (or alveoli) smaller than anterior teeth (or alveoli)	anterior teeth (or alveoli) smaller than posterior teeth (or alveoli)				Unordered	Modified	Holtz et al., 2004 #261	Benson, 2009 #85	0	1	?	0	0	0	?	0	0	0	?	-	-	?	?	?	0	?	?	0	0	?	?	?	0	0	0	?	?	0	?	?	0	1	1	1	1	?
8	Anterior premaxillary teeth (or alveoli), size:	significantly smaller than the first six anterior maxillary teeth (or alveoli)	subequal in size than the first six anterior maxillary teeth (or alveoli)	significantly larger than the first six anterior maxillary teeth (or alveoli)				Unordered	New	New		0	1	?	0	?	0	?	0	0	0	?	-	-	?	1	?	?	?	?	1	1	?	?	?	0	?	0	0	?	0	0	?	0	1	1	?	1	?
9	Posterior premaxillary teeth (or alveoli), size:	significantly smaller than the first six anterior maxillary teeth (or alveoli)	subequal in size than the first six anterior maxillary teeth (or alveoli)	significantly larger than the first six anterior maxillary teeth (or alveoli)				Unordered	Modified	Holtz, 2001 #15	Currie et al., 2003 #75 ; Holtz et al., 2004 #258 ; Senter, 2007 #257 ; Zhang et al., 2008 #257 ; Li et al., 2009 #257 ; Brusatte et al., 2010b #218 ; Carr & Williamson, 2010 #216	0	0	?	0	?	0	?	0	0	0	?	[12]	-	?	?	?	1	?	1	1	1	?	?	?	0	0	0	0	?	0	?	?	0	0	0	?	0	?
10	First premaxillary tooth (or alveolus), size:	subequal in size than second tooth (or alveolus)	significantly smaller than second tooth (or alveolus)	significantly bigger than second tooth (or alveolus)				Unordered	Modified	Sereno et al., 1998 #38	Currie & Varrichio, 2004 #42 ; Norell et al., 2006 #42 ; Turner et al., 2007 #251 ; Zanno et al., 2009 #251 ; Li et al., 2009 #251 ; Choiniere et al., 2010 #160	0	0	?	0	1	0	?	1	0	0	?	-	-	?	0	?	?	?	?	0	[01]	?	?	?	0	?	0	0	?	0	0	?	0	0	0	0	1	?
11	Second premaxillary tooth (or alveolus), size:	subequal in size than third (and fourth) premaxillary tooth (or alveolus)	significantly smaller than third (and fourth) tooth (or alveolus)	significantly larger than third (and fourth) tooth (or alveolus)				Unordered	Modified	Currie, 1995 #4	Norell et al., 2001 #83 ; Makovicky et al., 2004 #82 ; Holtz et al., 2004 #261 ; Hwang et al., 2004 #82 ; Xu & Norell, 2004 #82 ; Makovicky et al., 2005 # 81 ; Turner et al., 2007 #81 ; Senter, 2007 #82 (extended) ; Kirkland et al., 2005 #82 ; Zhang et al., 2008 #82 ; Zanno et al., 2009 #81 ; Li et al., 2009 #81 ; Choiniere et al., 2010 #161	0	2	?	0	0	0	?	0	0	0	?	-	-	?	?	?	0	?	0	0	0	?	?	?	0	0	0	0	?	0	?	?	0	1	1	2	2	?
12	Posteriormost premaxillary tooth (or alveolus), mesiodistal length in palatal view:	subequal in size than more anterior teeth (or alveoli)	significantly smaller than more anterior teeth (or alveoli)	significantly larger than anterior teeth (or alveoli)				Unordered	New	New		0	1	?	0	1	0	?	1	0	0	?	-	-	?	?	?	0	?	0	0	0	?	?	?	0	0	0	?	?	0	?	?	0	1	1	1	1	?
13	Distal premaxillary alveoli, shape in palatal view:	oval to subcircular	subrectangular						New	New		0	?	?	?	0	0	?	0	0	0	?	0	-	?	?	?	1	?	?	1	1	?	?	?	0	?	?	0	?	0	0	?	0	0	0	0	0	?
14	Premaxillary tooth row, posterior extension (position of posteriormost premaxillary tooth):	aligned (ventral) to external naris	anterior to external naris						Modified	Sereno, 1999 #36	Carrano et al., 2002 #3 ; Holtz, Molnar & Currie, 2004 #17 ; Tykoski, 2005 #9 ; Yates, 2005 ; Alain et al., 2007 #9 ; Smith et al., 2007-2008 #9	0	0	0	0	0	0	?	0	0	0	?	0	-	?	?	?	0	0	0	0	0	0	0	?	0	0	0	0	?	0	0	?	0	1	1	1	1	?
15	Premaxilla in palatal view:	unconstricted	slightly constricted	strongly constricted, terminal rosette of premaxilla				Ordered	New	New		0	0	0	0	2	1	?	2	0	0	?	0	-	?	?	?	0	0	0	0	0	0	?	?	0	0	?	0	?	0	?	?	0	2	2	2	2	?
16	Subnarial gap/diastema (i.e., posterior part of premaxillary alveolar margin unedentelous, resulting in an interruption of the upper tooth row):	absent	present and short, diastema not extensive enough to host more than one tooth	present and long, diastema extensive enough to host more than one tooth				Ordered	Modified	Gauthier 1986 ; Welles, 1984 ; Rowe 1989 ; Rowe and Gauthier 1990 ; Sereno, 1999 #34	Holtz, 1994 #6 ; Rauhut, 2003 #9 ; Tykoski & Rowe, 2004 #13 ; Holtz, Molnar & Currie, 2004 #23 ; Ezcurra & Novas, 2007 #13 ; Rauhut et al., 2009 #11 ; Choiniere et al., 2010 #32 ; Sereno et al., 1998 #39 ; Wilson et al., 2003. Sereno et al., 2004 #9 ; Yates, 2005 #230	0	1	0	1	0	1	?	2	0	0	?	0	-	?	?	?	0	0	0	0	0	0	0	?	0	0	0	0	?	0	?	?	0	0	0	1	2	?
17	First premaxillary alveoli open:	ventrally, decumbent teeth	anteroventrally, procumbent teeth						New	New		0	1	?	0	0	0	?	0	0	0	?	-	-	?	?	?	0	0	0	0	0	0	1	?	0	0	0	0	?	0	0	?	0	0	0	0	0	?
II.	MAXILLA ALVEOLI/TEETH
18	Maxillary teeth:	present in the anterior and posterior portions of the maxilla (posteriormost portion excluded)	absent in the anteriormost portion of the maxilla	absent in the posterior portion of the maxilla (i.e., tooth row extending only on the anterior 75% of the bone or less)	absent in the whole maxilla, toothless maxilla			Unordered	Modified	Modified from Holtz, 1998 #56		0	0	0	0	?	0	0	0	0	0	?	[01]	3	0	0	0	0	0	0	0	0	0	?	0	0	0	0	0	0	0	0	0	0	0	0	0	0	?
19	Number of maxillary teeth (or alveoli):	>19	18-19	16-17	15	10-14	1-9	Ordered	Modified	Perle et al., 1993	Sereno et al., 1998 #26 ; Carrano et al., 2002 #58 ; Currie & Varrichio, 2004 #39 ; Holtz et al., 2004 #252 ; Tykoski, 2005 #27 ; Norell et al., 2006 #39 ; Ezcurra & Novas, 2007 #16 ; Smith et al., 2007-2008 #35 ; Carrano & Sampson, 2008 #68 ; Longrich & Currie, 2009 #2 ; Benson, 2009 #86 ; Brusatte et al., 2009 #220 & 221 ; Carr & Williamson, 2010 #218	18/1	9-10/4	11/4	18/1	?	22-26/0	>14/?	12/4	12-15/[34]	>6/?	?	8-5/5	-	10-11/4	?	>11/?	>16/?	>7/?	13/4	14/4	17/2	19/1	?	18/1	16-17?/2	13/4	?	>7/?	14/4	13/4	>11/?	13-14/4	10-13/4	>8/?	22/0	>9/?	12/4	>4/?
20	Anterior maxillary teeth (or alveoli), size:	subequal in size than posterior teeth (or alveoli)	significantly larger than posterior maxillary teeth (or alveoli)	significantly smaller than posterior maxillary teeth (or alveoli)				Unordered	Modified	Zanno et al., 2009 #340		1	1	1	1	?	1	?	1	1	?	?	0	-	1	1	?	1	?	1	0	1	1	?	?	1	1	1	?	1	1	1	1	1	1	1	?	1	?
21	Mid-maxillary teeth (or alveoli), mesiodistal length:	subequal in size than anteriormost maxillary teeth (or alveoli)	significantly larger than anteriormost maxillary teeth (or alveoli)	significantly smaller than anteriormost maxillary teeth (or alveoli)				Unordered	New	New		0	2	0	0	?	0	?	1	1	1	?	1	-	0	0	0	1	?	0	0	1	0	?	0	0	0	1	?	0	0	0	0	0	0	0	?	0	?
22	First maxillary tooth (or alveolus), size:	significantly smaller than second tooth (or alveolus)	subequal in size than second tooth (or alveolus)						Modified	Sereno et al., 1998 #38	Currie & Varrichio, 2004 #42 ; Norell et al., 2006 #42 ; Turner et al., 2007 #251 ; Zanno et al., 2009 #251 ; Li et al., 2009 #251 ; Choiniere et al., 2010 #160	0	0	?	0	?	1	?	1	1	1	?	0	-	1	?	?	1	?	1	1	1	?	?	0	1	?	?	?	1	1	1	1	1	0	0	?	0	?
23	First maxillary teeth (or alveoli) open:	ventrally, decumbent teeth	anteroventrally, procumbent teeth						Modified	Rowe, 1989	Tykoski, 2005 #26 ; Allain et al., 2007 #26	0	0	0	0	?	1	?	1	0	0	?	0	-	0	0	0	0	0	0	0	0	0	0	0	0	0	0	0	0	0	0	0	0	1	1	?	1	0
24	Mid-maxillary teeth, inclination:	pointing ventrally (decumbent)	pointing labioventrally (laterocumbent)	pointing anteroventrally (procumbent)	pointing posteroventrally (retrocumbent)			Unordered	New	New		0	0	0	0	0	0	0	0	0	0	?	0	-	0	0	0	0	0	0	0	0	0	2	0	0	0	[03]	0	0	0	0	0	0	0	0	0	1	0
25	Maxillary alveoli, shape in palatal view:	oval to lenticular	subrectangular	circular	merged to form an open alveolar groove (interdental septa absent)			Unordered	New	New		0	?	0	?	0	0	0	0	0	0	?	0	-	0	0	1	1	?	1	1	1	?	?	0	0	?	?	0	0	0	0	0	0	2	2	2	2	0
26	Maxillary tooth row, posterior extension (position of posteriormost tooth):	posterior to the anteriormost rim of orbit	anterior or aligned to the anteriormost rim of orbit, posterior to the posteriormost rim of antorbital fenestra	anterior or aligned to the posteriormost rim of antorbital fenestra, posterior to the anteriormost rim of antorbital fenestra	aligned to the anteriormost rim of antorbital fenestra	anterior to the anteriormost rim of the antorbital fenestra		Ordered	Modified	Gauthier, 1986 ; Harris, 1998 #3 ; Holtz, 1998 #133 ; Rauhut 2003 #70	Holtz, 1994 #110 ; Sereno et al., 1996 #6 ; Makovicky & Sues, 1998 #6 (modified) ; Sereno, 1999 #3 ; Currie & Carpenter, 2000 #5 ; Allain, 2002 #2 ; Carrano et al., 2002 #57 ; Tykoski & Rowe, 2004 #64 ; Tykoksi, 2005 #29 ; Novas et al., 2005 #3 ; Ezcurra & Novas, 2007 #39 ; Smith et al., 2007-2008 #3 ; Allain et al., 2007 #29 ; Zanno et al., 2009 #82 ; Brusatte et al., 2010 #34 ; Carr & Williamso…	0	0	?	0	?	0	?	1	0	?	?	2	-	?	?	?	?	?	?	?	1	1	?	?	?	2	2	?	2	2	?	?	2	?	2	2	3	?
III.	DENTARY ALVEOLI/TEETH
27	Dentary teeth	present in the anterior and posterior portions of the dentary	absent in the anteriormost portion of the dentary	absent in the posterior portion of the dentary (i.e., tooth row extending only on the anterior 75% of the bone or less)	absent in the whole dentary, toothless dentary			Unordered	Modified	Modified from Sereno, 1999 #175		0	0	0	0	?	0	0	0	0	0	?	[12]	3	?	0	?	?	?	?	0	0	0	0	0	0	0	0	0	?	0	0	0	0	0	0	0	0	?
28	Number of dentary teeth (or alveoli):	> 25	18-25	15-17	< 15			Ordered	Modified	Senter, 2002 #22 ; Carrano et al., 2002 #59	Holtz et al., 2004 #269 ; Clark et al., 2004 #15 ; Kirkland et al., 2005 #85 ; Smith et al., 2007-2008 #127 ; Choiniere et al., 2010 #177 ; Ezcurra & Novas, 2007 #102 ; Zanno et al., 2009 #84 ; Brusatte et al., 2009 #222 ; Carr & Williamson, 2010 #219	17/2	?	12/3	?	?	25-27/0	20/1	17/2	11-15/[23]	<14/3	?	11-12/3	-	?	10-12/3	?	?	?	?	>7/?	17/2	?	?	?	22-23/1	18/1	12-14/3	12-13/3	?	13/3	>13/?	13-14/3	13/3	26/0	32/0	>12/?	15/2	?
29	Dentary alveoli in dorsal view:	in separate alveoli	merged to form an open alveolar groove (interdental septa absent)						Modified	Chiappe et al., 1996 (Currie 1987)	Chiappe et al., 1996 #92 ; Holtz, 1998 #134 ; Holtz et al., 2004 #271 ; Makovicky et al., 2005 #85 ; Senter, 2007 #260 ; Turner et al., 2007 #85 ; Zhang et al., 2008 #260 ; Zanno et al., 2009 #85 ; Li et al., 2009 #85 ; Choiniere et al., 2010 #175	0	0	0	?	0	0	0	0	0	0	?	0	-	?	0	?	?	?	?	0	0	?	?	0	0	0	0	0	?	0	0	0	0	0	0	0	0	?
30	Anteriormost dentary teeth (or alveoli), size:	subequal in size than mid- and posterior dentary teeth (or alveoli)	significantly larger than mid- and posterior dentary teeth (or alveoli)	significantly smaller than mid- and posterior dentary teeth (or alveoli)				Unordered	Modified	Modified from Russell & Dong, 1993	Tykoski, 2005 #101 ; Allain et al., 2007 #101 ; Zanno et al., 2009 #265	0	1	?	?	?	1	0	1	0	0	?	0	-	?	0	?	?	?	?	?	2	?	?	?	0	0	0	0	?	0	0	0	?	1	1	?	1	?
31	First dentary tooth (or alveolus), size in comparison to second and third dentary alveoli:	subequal in size	first tooth (or alveolus) substantially smaller	first tooth (or alveolus) substantially larger				Unordered	Modified	Modified from Gauthier, 1986 #36 and Harris, 1998 #48. Based on Holtz et al., 2004 #213 and Sereno et al., 2004 #71	Benson, 2009 #79 ; Brusatte et al., 2010a #175	0	0	?	?	?	0	1	1	1	1	?	0	-	?	0	?	?	?	?	1	1	?	?	?	1	0	1	1	?	1	1	1	?	1	1	?	1	?
32	Mid-dentary teeth (or alveoli), size:	subequal in size than anterior maxillary teeth (or alveoli)	significantly smaller than anterior maxillary teeth (or alveoli)	significantly larger than anterior maxillary teeth (or alveoli)				Unordered	Modified	Pérez-Moreno et al., 1994	Sereno, 1999 #145 ; Benson, 2009 #87	1	1	1	?	?	?	0	1	1	1	?	1	-	?	0	?	?	?	?	0	0	?	0	?	1	1	1	1	?	1	0	0	1	1	1	?	1	?
33	Terminal rosette of dentary, number of teeth (or alveoli):	terminal rosette absent	four teeth (or alveoli)	five teeth (or alveoli)				Unordered	New	New		0	0	0	?	?	?	1	1	0	0	?	0	-	?	0	?	?	?	?	0	0	?	0	0	0	0	0	1	?	0	0	0	0	1	1	?	[12]	?
34	First dentary alveoli open:	dorsally, recumbent teeth	anterodorsally, procumbent teeth						New	New		0	1	0	?	?	0	0	0	0	0	?	0	-	?	1	?	?	?	?	0	0	?	1	0	0	0	1	0	?	0	0	0	0	0	?	?	1	?
35	Mid-dentary teeth, inclination:	pointing dorsally, decumbent	pointing anterodorsally, procumbent						New	New		0	0	0	?	?	0	0	0	0	0	?	0	-	?	0	?	?	?	?	0	0	?	1	0	0	0	0	0	?	0	0	0	0	0	0	?	0	?
36	Dentary teeth, spacing:	evenly spaced	anterior dentary teeth more closely appressed than those in middle and posterior parts of the tooth row						Norell et al., 2001#90	Norell et al., 2001#90		0	0	0	?	?	0	0	0	0	0	?	0	-	?	0	?	?	?	?	0	0	?	0	0	0	0	0	0	?	0	0	0	0	0	0	?	0	?
VI.	PALATAL TEETH
37	Palatal teeth on the pterygoid:	present	absent						Sereno, 1999 #107	Sereno, 1999 #107	Rauhut, 2003 #69 ; Smith et al., 2007-2008 #120 ; Choiniere et al., 2010 #157	1	?	0	0	?	1	1	?	1	?	?	1	1	?	?	?	?	?	?	?	1	?	?	?	?	1	?	?	?	1	?	1	1	1	1	1	1	?
V.	MESIAL TEETH
	Crown
38	Mesial teeth, constriction between root and crown:	absent	constriction weak, base of crown occupying more than 85% of largest crown width	constriction important, base of crown occupying 85% or less of largest crown width				Ordered	Modified	Martin et al., 1980 ; Hou et al., 1996 ; Currie, 1987	Gauthier 1986 ; Langer 2004 ; Pérez-Moreno et al., 1994 ; Holtz, 1998 #130 ; Forster et al., 1998 #5 ; Makovicky & Sues, 1998 #3 ; Sereno, 1999 #4 ; Xu et al., 1999 #29 ; Rauhut, 2003 #87 ; Holtz et al., 2004 #255 ; Senter et al., 2004 #21 ; Xu & Norell, 2004 #88 ; Kirkland et al., 2005 #88 ; Makovicky et al., 2005 # 88 ; Turner et al., 2007 #88 ; Ezcurra & Novas, 2007 #114 ; Ezcurra & Novas, 200…	0	0	?	1	0	0	0	0	0	0	?	0	-	?	2	?	?	0	?	0	[01]	0	2	?	0	0	0	?	?	0	0	?	?	0	0	?	0	?
39	Mesial teeth, constriction between root and crown along the tooth row:	present in some teeth	present in all teeth						New	New		9	9	?	0	9	9	9	9	9	9	?	9	-	?	1	?	?	9	?	9	0	9	1	?	9	9	9	?	?	9	9	?	?	9	9	?	9	?
40	Mesial teeth, height of the largest crown (CH in centimetres) in subadults/adults:	CH ≤ 1	1 < CH ≤ 6	CH > 6				Ordered	New	New		1.1-2.1/1	1	?	0.19-0.25/0	1	0.4-0.68/0	0.8/0	3.9-5.2/1	4.4/1	6-7/2	?	0	-	?	0.6-0.78/0	?	?	1.12-2.26/1	?	2-3/1	1.9-3/1	2.8/1	0	?	1	2.71-33.7/1	0	>1/1	?	2.2/1	?	?	9/2	2.5/1	?	?	?	?
41	Mesial teeth, labiolingual compression of the crown (CBR = CBW/CBL):	CBR < 0.5, lenticular and strongly labiolingually compressed	0.5<CBR ≤ 0.75, oval to lenticular	weak, 0.75 < CBR < 1.2, tooth subcircular	CBR ≥ 1.2, teeth labiolingually elongated			Unordered	Modified	Sereno et al., 1998 #17 ; Charig & Milner, 1997	Forster et al., 1998 #4 ; Xu et al., 1999 #27 ; Holtz et al., 2004 #266 ; Benson, 2009 #91	0.57-0.64/1	?	?	0.64-0.94/[12]	0.47/0	0.31-0.57/[01]	0.68/1	0.56-0.73/1	0.65-0.84/[12]	0.46-0.73/[01]	?	?	-	?	1-1.24/[23]	?	0.57/1	0.52-0.61/1	?	0.62-1.15/[12]	0.55-0.89/[12]	0.62/1	?	?	0.54-0.58/1	0.62-0.71/1	?	?	?	0.72-0.73/1	0.63/1	?	0.54-0.67/1	0.79-0.92/2	?	?	0.73-1/[12]	?
42	Mesial teeth, baso-apical elongation of the crown (CHR = CH/CBL):	strongly elongated, CHR > 3	important, 2.5 < CHR ≤ 3	normal, 2 < CHR ≤ 2.5	weak, CHR ≤ 2			Unordered	New	New		1.1-2.1/[23]	[23]	?	2-3/[12]	2.09/2	2.35-3.77/[012]	?	2.78-3.25/[01]	1.4-1.87/3	2-3.5/[012]	?	?	-	?	2.75-3.15/[01]	?	?	1.21-1.95/3	?	1.55-1.87/3	2.17-2.31/3	2.07/2	1	?	2.36/2	1.92-2.19/[23]	[12]	?	?	2.09-2.16/2	2/2	?	?	2.37-2.52/[12]	?	?	?	?
43	Mesial teeth, crown recurvature (lingually or distally):	present, strongly recurved	present, slightly recurved	absent, tooth crown straight and apex centrally positioned or almost centrally positioned				Unordered	Modified	Sereno et al., 1998 #35	Sereno, 1999 #192 ; Xu et al., 1999 #28 ; Holtz et al., 2004 #265 ; Benson, 2009 #96	1	0	?	1	1	1	1	0	[01]	0	?	[01]	-	?	1	?	?	[12]	?	[12]	[12]	2	2	?	1	[01]	[01]	1	?	1	?	?	?	1	1	?	?	?
44	Mesial teeth, distal margin of the crown in lateral view:	mainly concave	straight	mainly convex				Unordered	Modified	Canale et al., 2009 #5 (Smith, 2007)		0	0	?	0	0	0	[01]	0	[01]	0	?	?	-	?	0	?	?	[12]	?	[12]	[12]	2	2	?	[01]	0	0	0	?	0	?	?	?	0	0	?	1	?
45	Mesial teeth, outline of basal cross-section of the crown in the mesialmost tooth:	subcircular, ovoid or elliptical	lanceolate, with acute and well-developed distal carina	Salinon shape, with labial margin convex and lingual margin biconcave	D-shaped or J-shaped, with lingual margins strongly convex and labial margin convex or sigmoid	U-shaped, with mesial and distal margin subparalell	lenticular, with acute and well-developed distal and mesial carinae	Unordered	Modified	Bakker et al., 1988 #1	Holtz, 1994 #126 ; Harris, 1998 #46 (modified) ; Holtz, 1998 #132 ; Currie & Carpenter, 2000 #41 ; Holtz, 2001 #14 ; Allain, 2002 #28 ; Carrano et al., 2002 #56 ; Xu et al., 2002 #70 ; Currie et al., 2003 #76 ; Tykoski & Rowe, 2004 #62 ; Holtz et al., 2004 #257 ; Makovicky et al., 2004 #91 ; Hwang et al., 2004 #91 ; Tykoski & Rowe, 2004 #62 ; Xu & Norell, 2004 #91 ; Yates, 2005 #231 ; Kirkland et…	0	0	?	0	1	0	0	0	0	0	?	?	-	?	2	?	2	2	?	[23]	[23]	?	?	?	1	1	?	?	?	1	1	?	1	0	0	?	0	?
46	Mesial teeth, concave surface adjacent to the carina:	absent	on the labial surface and adjacent to the distal carina	on the lingual surface and adjacent to both carinae	on the lingual surface and adjacent to the mesial carina only	on the lingual surface and adjacent to the distal carina only	one main concave surface centrally positioned on the lingual side of the crown	Unordered	New	New		0	0	?	[01]	0	0	0	0	0	0	?	?	-	?	3	?	?	3	?	[23]	[23]	3	0	?	0	0	?	0	?	0	?	?	0	0	0	?	0	?
	Carinae
47	Mesial teeth, mesial carina:	absent	present						New	New		0	1	?	[01]	1	[01]	1	1	1	1	?	0	-	?	1	?	1	1	?	1	1	1	0	?	1	1	0	1	?	1	1	?	1	1	1	?	1	?
48	Mesial teeth, mesial carina:	non-serrated	serrated						Modified	Senter et al., 2004 #20	Senter, 2007 #258 ; Zhang et al., 2008 #258	9	1	?	1	1	1	1	1	1	1	?	9	-	?	[01]	?	1	1	?	1	1	1	9	?	1	?	9	1	?	1	1	?	1	1	1	?	0	?
49	Mesial teeth, distal carina:	serrated	non-serrated						New	New		0	0	?	0	0	0	0	0	0	0	?	1	-	?	0	?	?	0	?	0	0	0	1	?	0	0	[01]	0	?	0	0	?	0	0	0	?	1	?
50	Mesial teeth, mesial carina:	straight and centrally positioned on the crown	slightly twisted, curves onto the mesiolingual surface	strongly twisted, curves onto the lingual surface	almost straight and strongly lingually deflected			Ordered	New	New		9	0	?	0	0	0	0	0	0	0	?	9	-	?	2	?	0	0	?	[01]	[01]	0	9	?	0	0	9	0	?	0	?	?	0	0	0	?	0	?
51	Mesial teeth, mesial carina, and if serrated, mesial serration:	terminates well-above the cervix	extends to the cervix or just above it	terminates well beneath the cervix				Unordered	Modified	Benson, 2009 #89		9	0	?	0	0	0	0	0	0	0	?	9	-	?	1	?	?	[01]	?	[01]	2	2	9	?	0	0	9	?	?	0	?	?	0	2	2	?	[12]	?
52	Mesial teeth, distal carina:	centrally positioned or slightly displaced	strongly labially deflected						New	New		1	0	?	1	0	1	0	1	0	0	?	9	-	?	1	?	0	0	?	0	0	0	9	?	0	1	?	0	?	0	0	?	0	0	0	?	0	?
53	Mesial teeth, position of mesial carina on the crown in articulation in mesialmost teeth:	facing mostly labially	facing mostly mesially	facing mostly lingually				Unordered	Modified	Currie, 1995 #2		9	1	?	1	?	1	1	?	1	0	?	9	-	?	2	?	1	?	?	1	1	?	9	?	1	1	9	0	?	0	?	?	0	?	?	?	0	?
54	Mesial teeth, position of distal carina on the crown in articulation in mesialmost teeth:	facing mostly distally or labiodistally	facing mostly lingually						New	New		0	0	?	0	?	0	0	?	0	0	?	9	-	?	0	?	0	?	?	0	0	?	9	?	0	0	0	1	?	[01]	1	?	0	?	?	?	1	?
	Denticles
55	Mesial teeth, average number of denticles per five millimetres on mesial carina at two-thirds height of the crown (MCA) in subadults/adults:	≥ 20	14-19	9-13	≤ 8			Unordered	Modified	Russel & Dong, 1993 #20	Clark et al., 1994 ; Holtz, 1998 #128 ; Sereno, 1999 #3 ; Xu et al., 1999 #26 ; Norell et al., 2001 #87 ; Xu et al., 2002 #65 ; Holtz et al., 2004 #253 ; Makovicky et al., 2004 #86 ; Clark et al., 2004 #13 ; ; Hwang et al., 2004 #86 ; Xu & Norell, 2004 #86 ; Kirkland et al., 2005 #86 ; Makovicky et al., 2005 # 86 ; Turner et al., 2007 #86 ; Zhang et al., 2008 #86 ; Li et al., 2009 #86 ; Choiniere…	9	?	?	15-17.5/1	?	9	30/0	15.5-16.5/1	8-13/[23]	12/2	?	9	-	?	35-40/0	?	?	9-10/2	?	7-11/[23]	8-11/[23]	13/2	9	?	25-27.5/0	?	9	12/2	?	12-13/2	8,75/[23]	?	5.5/3	35/0	25-35/0	?	Inapplicable	?
56	Mesial teeth, average number of mid-crown denticles per five millimetres on distal carina (DC) in subadults/adults:	≥ 20	14-19	9-13	≤ 8			Unordered	Modified	Russel & Dong, 1993 #20	Clark et al., 1994 ; Holtz, 1998 #128 ; Sereno, 1999 #3 ; Xu et al., 1999 #26 ; Norell et al., 2001 #87 ; Xu et al., 2002 #65 ; Holtz et al., 2004 #253 ; Makovicky et al., 2004 #86 ; Clark et al., 2004 #13 ; ; Hwang et al., 2004 #86 ; Xu & Norell, 2004 #86 ; Kirkland et al., 2005 #86 ; Makovicky et al., 2005 # 86 ; Turner et al., 2007 #86 ; Zhang et al., 2008 #86 ; Li et al., 2009 #86 ; Choiniere…	20/0	?	?	25/0	13/2	45/0	25/0	13-14.5/[12]	7-9/[23]	12.5/2	?	9	-	?	30-40/0	?	?	10/2	?	7-10/[23]	8.5-12/[23]	14-15/1	9	?	15-18.75/1	16.25-18.75/1	0	12.5/2	?	12-13/2	8/3	?	5.5/3	35/0	25-35/0	?	Inapplicable	?
57	Mesial teeth, denticle size (except in embryos and hatchlings):	minute denticles, more than 250 denticles on the distal carina	normal in height, between 15 to 250 denticles on the distal carina	very larges denticles, less than 15 denticles on the distal carina				Ordered	New	New		1	1	?	1	1	1	1	1	1	1	?	9	-	?	1	?	?	1	?	1	1	1	9	?	1	1	?	1	?	1	1	?	1	0	0	?	9	?
58	Mesial teeth, denticles on mesial carina:	rounded and symmetrically convex	rounded and asymmetrically convex	strongly hooked/pointed, denticles with a tip pointing apically				Unordered	Modified	Norell et al., 2001 #88	Xu et al., 2002 #66 ; Makovicky et al., 2004 #87 ; Hwang et al., 2004 #87 ; Xu & Norell, 2004 #87 ; Kirkland et al., 2005 #87 ; Makovicky et al., 2005 # 87 ; Turner et al., 2007 #87 ; Zhang et al., 2008 #87 ; Li et al., 2009 #87 ; Choiniere et al., 2010 #167	9	1	?	2	?	9	?	0	0	0	?	9	-	?	0	?	?	0	?	?	[12]	?	9	?	0	?	9	0	?	0	0	?	?	0	0	?	9	?
59	Mesial teeth, denticles on distal carina:	rounded and symmetrically convex	rounded and asymmetrically convex	strongly hooked/pointed, denticles with a tip pointing apically				Unordered	Modified	Senter et al., 2004 #23		0	0	?	[12]	0	0	0	0	0	0	?	9	-	?	0	?	?	[12]	?	?	2	?	9	?	0	0	?	0	?	0	0	?	?	0	0	?	9	?
60	Mesial teeth, size of mesial denticles relative to distal denticles (DSDI):	mesial and distal denticles of same size, 0.8 < DSDI <1.2	mesial denticles larger than distal ones, DSDI < 0.8	distal denticles larger than mesial ones, DSDI > 1.2				Unordered	Modified	Rauhut & Werner, 1995	Holtz, 1998 #129 ; Holtz et al., 2004 #254 ; Norell et al., 2006 #38 (modified) ; Turner et al., 2007 #247 ; ; Zanno et al., 2009 #247 ; Rauhut et al., 2009 #88	9	?	?	1	2	9	0	2	2	0	?	9	-	?	[02]	?	?	0	?	0	0	?	9	?	2	?	9	?	?	0	0	?	?	0	0	?	9	?
61	Mesial teeth, denticles contiguous over tip or very close to the apex:	present	absent						Modified	Harris, 1998 #45		?	0	?	1	0	0	?	0	0	?	?	9	-	?	0	?	?	0	?	?	0	0	9	?	0	?	1	0	?	?	0	?	0	0	0	?	9	?
62	Mesial teeth, interdenticular sulci:	absent	present, short	present, long and well-developed				Unordered	Modified	Benson, 2009 #90		0	0	?	0	0	0	0	0	[01]	0	?	9	-	?	0	?	?	2	?	0	2	0	9	?	1	0	0	1	?	0	?	?	?	0	0	?	9	?
	Ornamentations
63	Mesial teeth, flutes (i.e., subparallel longitudinal grooves separated by acute ridges) on the crown:	absent	present on the lingual surface only	present on both labial and lingual surfaces	present on the labial surface only			Unordered	Modified	Sereno et al., 1998 #18 ; Charig & Milner, 1997	Benson, 2009 #93	0	0	?	0	0	3	0	0	1	0	?	0	-	?	1	?	?	0	?	0	0	0	0	?	0	0	0	0	?	0	0	?	0	1	[12]	?	2	?
64	Mesial teeth, longitudinal groove on the labial and/or lingual side of the crown:	absent	present, a single groove centrally positioned	present, a single groove mesially positioned				Unordered	New	New		0	0	?	0	0	0	0	0	0	0	?	0	-	?	0	?	?	0	?	0	0	0	0	?	0	0	0	0	?	0	0	?	0	0	0	?	0	?
65	Mesial teeth, longitudinal ridge, different of flutes, on the lingual side of the crown:	absent	present, a single ridge centrally positioned	present, more than one ridge				Unordered	New	New		0	0	?	0	0	0	0	0	0	0	?	0	-	?	0	?	?	0	?	0	0	0	0	?	0	0	0	0	?	0	0	?	0	0	0	?	0	?
66	Mesial teeth, basal striations, different of flutes, on both lingual and labial sides of the crown	absent	present						New	New		1	0	?	0	0	0	0	0	0	0	?	0	-	?	0	?	?	0	?	0	0	0	0	?	0	0	0	0	?	0	0	?	0	0	0	?	0	?
VI.	LATERAL TEETH
	Crown
67	Lateral teeth, constriction between root and crown:	absent	constriction weak, base of crown base occupying more than 85% of largest crown width mesiodistally	constriction important, base of crown base occupying 85% or less of largest crown width mesiodistally				Ordered	Modified	Hou et al., 1996 ; Currie, 1987	Gauthier 1986 ; Langer 2004 ; Pérez-Moreno et al., 1994 ; Holtz, 1998 #130 ; Forster et al., 1998 #5 ; Makovicky & Sues, 1998 #3 ; Sereno, 1999 #4 ; Xu et al., 1999 #29 ; Rauhut, 2003 #87 ; Holtz et al., 2004 #255 ; Senter et al., 2004 #21 ; Xu & Norell, 2004 #88 ; Kirkland et al., 2005 #88 ; Makovicky et al., 2005 # 88 ; Turner et al., 2007 #88 ; Ezcurra & Novas, 2007 #114 ; Ezcurra & Novas, 200…	0	0	0	[12]	0	0	0	0	0	0	0	0	-	0	0	0	0	0	0	0	0	0	1	0	0	0	1	0	0	0	0	0	0	0	0	0	0	0
68	Lateral teeth, constriction between root and crown along the tooth row:	present in some teeth	present in all teeth						New	New		9	9	9	0	9	9	9	9	9	9	9	9	-	9	9	9	9	9	9	9	9	9	1	9	9	9	0	9	9	9	9	9	9	9	9	9	9	9
69	Lateral teeth, height of the largest crown (CH in centimetres) in subadults/adults:	CH ≤ 1	1 < CH ≤ 6	CH > 6				Ordered	New	New		0.4-2.1/1	1	0.97/0	0.16-0.64/0	1	1.16/1	1	2.4-5/1	72.8/2	6.05/2	3.2-4.2/1	0	-	0.33-0.5/0	1.2/1	1.4/1	1,5/1	2.4-3.3/1	1.8-3.6/1	1	1.2-3.8/1	2.21-3.95/1	0	5.2/1	4/1	41.5/1	0	>1/1	6,11/2	1.4-3.9/1	3.9-5.17/1	6.4/2	10.3-11.8/2	1.7-4.1/1	1.8-5.4/1	1.59-2.97/1	4.5-8.1/2	3.9-4.9/1
70	Lateral teeth, labiolingual compression of the crown (CBR = CBW/CBL):	important, CBR ≤ 0.5, tooth strongly flattened	normal, 0.5 < CBR ≤ 0.75	weak, CBR > 0.75, tooth incrassate or subcircular				Unordered	New	New		0.37-0.8/[012]	?	0.44-0.65/[01]	0.45-0.7/[01]	0	0.26-0.61/[01]	[01]	0.54-0.63/1	0.34-0.53/[01]	0.33-0.58/[01]	0.35-0.49/0	?	-	0.54-0.65/1	0.4-0.71/[01]	?	0.48-0.57/[01]	0.45-0.57/[01]	0.32-0.62/[01]	0.46-0.62/[01]	0.4-0.64/[01]	0.35/0	?	0.52-0.72/1	0.31-0.59/[01]	0.36-0.66/[01]	?	0.52/1	0.42/0	0.36-0.54/[01]	0.38-0.52/[01]	0.48-0.59/[01]	0.46-0.55/[01]	0.73-0.99/2	0.64-0.92/[12]	0.87/2	0.76-1/[12]	0.39-0.48/'0
71	Lateral teeth, baso-apical elongation of the crown (CHR = CH/CBL):	weak, CHR ≤ 1.5	normal, 1.5 < CHR ≤ 2.5	important, CHR > 2.5				Unordered	New	New		1.08-2.27/[01]	[12]	2.67/2	0.9-3/[01]	?	0.84-2.63/[01]	1	1.48-2.38/1	1.7-2.27/1	1.84-2.37/1	1.8-2.4/1	?	-	1-1.63/[01]	1.72-2.55/[12]	1.52/1	?	1.24-1.75/[01]	1.25-2.02/[01]	?	1.38-2.25/[01]	1.31-2.02/'[01]	1	2.04-2.52/[12]	1.06-2.47/[01]	1.13-2.14/[01]	1	?	2.21/1	1.42-2.21/[01]	1.87-2.35/1	1.76-2.52/1	1.75-2.8/[12]	1.78-2.3/1	2-3/[12]	1.9-2.56/[12]	2-2.93/[12]	2.2-2.58/[12]
72	Lateral teeth, distal margin of crown in lateral view:	strongly concave	slightly concave, roughly straight, or straight, apex positioned at the same level as distal profile	convex, apex positioned mesial to mesial profile	sigmoid, basal half concave and apical half convex	sigmoid, basal half convex and apical half concave		Unordered	New	New		[01]	0	0	1	0	0	[01]	0	[012]	[01]	0	[01]	-	1	0	1	[12]	1	1	[12]	[12]	[12]	2	0	0	[01]	0	0	0	0	0	0	0	[01]	[01]	2	[12]	0
73	Lateral teeth, mesial margin of crown in lateral view:	strongly convex	slightly convex, almost straight						New	New		0	0	0	0	0	0	0	0	0	0	0	0	-	0	0	0	0	0	0	0	0	0	0	0	0	0	0	0	0	0	0	0	0	0	0	1	1	0
74	Lateral teeth, mesiodistal curvature of the labial surface of the crown at one third of the crown:	convex	surface centrally positioned on the crown roughly flattened	surface centrally positioned on the crown concave, labial depression restricted to the crown base	surface centrally positioned on the crown concave, labial depression extends along the basal half of the crown or more apically			Unordered	New	from Peyer, 2006		0	0	0	0	0	0	0	[12]	[12]	[12]	[12]	?	-	0	0	0	0	0	0	0	0	0	0	1	0	0	?	0	0	0	0	0	0	0	0	0	0	1
75	Lateral teeth, concave surface adjacent to carinae all along the crown	absent	present on labial surface and adjacent to distal carina	present on lingual surface and adjacent to distal carina	present on labial surface and adjacent to both mesial and distal carinae	present on lingual surface and adjacent to both mesial and distal carinae		Unordered	New	New		0	0	1	[13]	0	[13]	0	[34]	[034]	[234]	2	?	-	0	0	0	0	0	0	0	0	0	0	0	0	0	?	0	1	0	0	0	0	0	0	0	0	0
76	Lateral teeth, outline of basal cross-section of the crown:	subcircular	lenticular or lanceolate	elliptical or bean-shaped (i.e., longitudinal depression centrally positioned on one side only)	8-shaped (i.e., longitudinal depression centrally positioned on both lingual and labial margins)	Subrectangular		Unordered	New	New		[02]	?	1	?	1	1	1	1	1	2	3	?	-	1	1	1	1	1	1	1	1	1	?	1	1	1	?	1	1	1	1	1	1	0	0	0	0	1
	Carinae
77	Lateral teeth, mesial carina:	present	absent						New	New		0	0	[01]	0	0	0	0	0	0	0	0	1	-	0	0	0	0	0	0	0	0	0	1	0	0	0	1	0	0	0	0	0	0	0	0	0	0	0
78	Lateral teeth, mesial carina:	serrated	non-serrated						Modified	Senter et al., 2004 #20	Senter, 2007 #258 ; Zhang et al., 2008 #258	0	0	0	0	0	0	0	0	0	0	0	9	-	0	0	0	0	0	0	0	0	0	1	0	0	0	9	0	0	0	0	0	0	0	0	1	1	0
79	Lateral teeth, distal carina:	present	absent						New	New		0	0	0	0	0	0	0	0	0	0	0	1	-	0	0	0	0	0	0	0	0	0	[01]	0	0	0	0	0	0	0	0	0	0	0	0	0	0	0
80	Lateral teeth, distal carina:	serrated	non-serrated						New	New		0	0	0	0	0	0	0	0	0	0	0	9	-	0	0	0	0	0	0	0	0	0	[01]	0	0	0	0	0	0	0	0	0	0	0	0	1	1	0
81	Lateral teeth, extension of mesial carina relative to distal carina	mesial carina extends at the same level or terminates more apically than the distal carina	mesial carina extends more basally than the distal carina						New	New		0	0	0	0	0	0	0	0	0	0	0	9	-	0	0	0	0	0	0	0	0	0	9	0	0	0	9	0	0	0	0	0	0	0	0	0	0	0
82	Lateral teeth, mesial carina, and if serrated, basalmost serration of the mesial carina:	terminates around mid-height of crown or more apically	extends to base of crown or slightly above the cervix	terminates well beneath the cervix				Unordered	Modified	Benson, 2010 #89		?	0	1	0	1	[01]	0	1	1	1	1	9	-	1	1	1	1	1	1	1	1	1	9	[01]	0	0	9	0	0	0	0	0	[01]	[12]	[12]	1	[01]	1
83	Lateral teeth, twisted mesial carina in some crowns	absent, mesial carina centrally positioned on mesial margin or weakly curved lingually towards the base in all teeth	present, mesial carina strongly twisting onto the mesiolingual surface in some teeth									0	0	0	0	0	0	0	0	0	0	0	9	-	0	0	0	0	0	0	0	0	0	9	1	0	0	9	0	0	0	0	0	0	0	0	0	0	0
84	Lateral teeth, distal carina, and if serrated, basalmost serration of the distal carina:	extends to the cervix or just above it	terminates well beneath the cervix	terminates well above the cervix				Unordered	Modified	Benson, 2010 #89		0	0	0	?	1	0	0	0	0	0	?	9	-	0	0	0	0	?	0	0	0	0	2	[01]	?	[01]	0	?	1	1	1	1	1	1	1	1	1	0
85	Lateral teeth, profile of the distal carina on the crown in distal view:	straight or very slightly bowed	strongly bowed or sigmoid						New	New		0	0	0	0	0	?	0	0	0	[01]	0	9	-	0	0	0	0	0	0	?	0	1	0	1	0	0	?	?	1	0	?	[01]	[01]	[01]	[01]	0	0	0
86	Lateral teeth, position of distal carina on the crown in distal view:	centrally positioned or slightly displaced, crown subsymmetrical	strongly labially deflected, crown asymmetrical						New	New		0	0	0	0	0	?	0	0	[01]	1	1	9	-	0	1	?	0	0	0	0	0	0	0	0	[01]	[01]	?	?	0	0	?	0	0	0	0	0	0	0
	Denticles/serrations
87	Lateral teeth, average number of denticles per five millimeters on mesial carina at two-thirds height of the crown (MCA) in subadults/adults:	≥ 30	16-29	9-15	≤ 8			Unordered	Modified	Russel & Dong, 1993 #20	Clark et al., 1994 ; Holtz, 1998 #128 ; Sereno, 1999 #3 ; Xu et al., 1999 #26 ; Norell et al., 2001 #87 ; Xu et al., 2002 #65 ; Holtz et al., 2004 #253 ; Makovicky et al., 2004 #86 ; Clark et al., 2004 #13 ; ; Hwang et al., 2004 #86 ; Xu & Norell, 2004 #86 ; Kirkland et al., 2005 #86 ; Makovicky et al., 2005 # 86 ; Turner et al., 2007 #86 ; Zhang et al., 2008 #86 ; Li et al., 2009 #86 ; Choiniere…	25/1	?	45/0	20-25/1	15.5/1	40-50/0	25-35/[01]	16-18/1	9-15/2	11/2	13-18/2	9	-	30-35/0	20-50/[01]	16/1	15-17/[12]	10-15/2	13-14/2	11-13/2	8-15/[23]	14/2	?	14-20/[12]	18.75-25/1	15-17.5/[12]	9	8-14/[23]	8/3	16/1	8-13/[23]	6.5-12.5/[23]	6-9.5/[23]	30-40/0	25-35/[01]	9	9	13-15/2
88	Lateral teeth, average number of mid-crown denticles per five millimetres on distal carina (DC) in subadults/adults:	≥ 30	16-29	9-15	≤ 8			Unordered	Modified	Russel & Dong, 1993 #20	Clark et al., 1994 ; Holtz, 1998 #128 ; Sereno, 1999 #3 ; Xu et al., 1999 #26 ; Norell et al., 2001 #87 ; Xu et al., 2002 #65 ; Holtz et al., 2004 #253 ; Makovicky et al., 2004 #86 ; Clark et al., 2004 #13 ; ; Hwang et al., 2004 #86 ; Xu & Norell, 2004 #86 ; Kirkland et al., 2005 #86 ; Makovicky et al., 2005 # 86 ; Turner et al., 2007 #86 ; Zhang et al., 2008 #86 ; Li et al., 2009 #86 ; Choiniere…	22/1	?	40-45/0	25-32.5/[01]	2	35-50/0	20-30/[01]	12.5-15/2	9-15/2	12,5-14/2	13.5-15/2	9	-	20-23/1	15-25/[12]	13.5-15/2	15/2	10-13/2	12-14/2	9-13/2	9-14/2	14-15/2	0	11-17/[12]	14-17.5/[12]	15-20/[12]	juvenile/9	9-12.5/2	12/2	16/1	9-13/2	7-13/[23]	6-9.5/[23]	30-40/0	25-35/[01]	9	9	12-14/2
89	Lateral teeth, denticle number on both mesial and distal carinae (except in embryos and hatchlings):	more than 250 denticles (minute denticles or very large number of denticles of normal size)	between 15 to 250 denticles (denticles of average size)	less than 15 denticles (very large denticles or very small number of small denticles)				Ordered	New	New		1	1	1	1	1	1	1	1	1	1	1	9	-	1	1	1	1	1	1	1	1	1	?	1	1	1	?	1	1	1	1	1	1	[01]	[01]	9	9	1
90	Lateral teeth, shape of denticles on mesial carina in lateral view:	symmetrically convex	asymmetrically convex	hooked/pointed				Unordered	Modified	Norell et al., 2001 #88	Xu et al., 2002 #66 ; Makovicky et al., 2004 #87 ; Hwang et al., 2004 #87 ; Xu & Norell, 2004 #87 ; Kirkland et al., 2005 #87 ; Makovicky et al., 2005 # 87 ; Turner et al., 2007 #87 ; Zhang et al., 2008 #87 ; Li et al., 2009 #87 ; Choiniere et al., 2010 #167	0	1	[01]	[12]	0	0	0	0	0	0	[01]	9	-	0	0	[01]	0	[01]	[01]	?	[12]	0	?	0	0	0	9	0	[01]	[01]	0	[01]	[01]	0	0	9	9	0
91	Lateral teeth, shape of denticles on distal carina in lateral view:	symmetrically convex	asymmetrically convex	hooked/pointed				Unordered	Modified	Senter et al., 2004 #23		0	0	0	[12]	0	0	0	0	0	[01]	[01]	9	-	0	[012]	2	2	[12]	[12]	?	2	0	0	[012]	1	0	[12]	0	[01]	[01]	[01]	[01]	[01]	0	0	9	9	0
92	Lateral teeth, shape of mesial margin of rounded denticles on mesial carina in lateral view:	parabolic	subrectangular, with flattened surface						New	New		0	0	0	0	0	[01]	[01]	0	[01]	0	?	9	-	0	[01]	[01]	0	0	[01]	?	0	0	?	0	[01]	[01]	9	[01]	[01]	[01]	[01]	[01]	[01]	[01]	[01]	9	9	[01]
93	Lateral teeth, shape of distal margin of rounded denticles on distal carina in lateral view:	parabolic	subrectangular, with flattened surface	semi-circular				Unordered	New	New		[01]	0	0	0	0	0	0	0	0	0	?	9	-	0	0	0	0	0	0	?	0	0	0	[02]	0	[02]	0	0	2	0	0	[02]	0	[01]	[01]	9	9	0
94	Lateral teeth, shape of denticles at two-thirds height of the crown (MC-MA) on mesial carina in lateral view:	longer apicobasally than mesiodistally, vertical subrectangular	as long mediodistally as apicobasally, subquadrangular	longer mediodistally than apicobasally, horizontal subrectangular				Unordered	New	New		1	0	[01]	0	0	[01]	[01]	[01]	1	1	?	9	-	0	0	0	0	1	1	?	0	1	?	[01]	0	0	9	0	0	0	0	0	1	2	1	9	9	1
95	Lateral teeth, shape of mid-crown denticles (DC) on distal carina in lateral view:	as long mediodistally as apicobasally, subquadrangular	longer mediodistally than apicobasally, horizontal subrectangular	longer apicobasally than mesiodistally, vertical subrectangular				Unordered	New	New		0	1	[01]	0	1	0	[01]	1	[012]	0	1	9	-	0	0	0	0	0	[01]	?	[01]	1	2	1	[01]	[01]	[02]	0	1	0	1	1	1	1	0	9	9	1
96	Lateral teeth, denticle size along the carinae	regular, gradual change in denticle size	irregular, sporadic change in denticle size						New	Mateus et al., 2011		0	0	0	0	0	0	0	0	0	0	0	9	-	0	0	0	0	0	0	?	0	0	?	0	0	0	0	0	0	0	0	0	0	1	1	9	9	0
97	Lateral teeth, biconvex apical denticles (i.e., biconvex external margin of denticle) on mesial carina in lateral view:	absent	present						New	New		0	?	0	0	0	0	?	0	0	0	0	9	-	0	0	0	0	1	1	?	0	0	0	0	0	0	9	0	?	0	1	1	?	1	0	9	9	1
98	Lateral teeth, orientation of mesiodistal axis of apical denticles on mesial carina in lateral view:	perpendicular to mesial margin	inclined apically from mesial margin						New	New		0	0	0	0	0	0	0	0	1	1	1	9	-	0	0	0	0	1	1	?	0	1	?	0	0	0	9	0	0	0	[01]	0	0	0	0	9	9	0
99	Lateral teeth, orientation of mesiodistal axis of mid-crown denticles on distal carina in lateral view:	perpendicular to distal margin	inclined apically from distal margin						New	New		0	0	0	1	0	0	0	0	[01]	[01]	?	9	-	0	[01]	1	1	1	1	?	1	[01]	0	0	0	0	0	0	0	0	0	0	0	0	0	9	9	0
100	Lateral teeth, average number of denticles on mesial carina:	higher number of denticles basally than at the mid-crown	lower number of denticles basally than at the mid-crown	subequal number of denticles basally than at the mid-crown				Unordered	New	New		9	0	2	9	0	9	9	0	0	9	9	9	-	0	0	?	?	0	0	0	0	0	?	2	0	?	9	9	9	9	9	9	9	0	2	9	9	0
101	Lateral teeth, average number of denticles on mesial carina:	higher number of denticles apically than at the mid-crown	lower number of denticles apically than at the mid-crown	subequal number of denticles apically than at the mid-crown				Unordered	New	New		?	0	0	9	?	0	0	?	[12]	2	1	9	-	?	0	0	0	0	0	?	0	?	?	0	0	0	9	?	0	0	1	1	1	2	2	9	9	0
102	Lateral teeth, average number of denticles on distal carina (except in embryos and hatchlings):	higher number of denticles basally than at the mid-crown	subequal or lower number of denticles basally than at the mid-crown						New	New		?	0	0	0	0	0	0	0	0	0	0	9	-	1	0	?	?	0	?	?	0	0	9	0	0	?	0	?	0	0	0	0	0	0	0	9	9	0
103	Lateral teeth, average number of denticles on distal carina:	higher number of denticles apically than at the mid-crown	lower number of denticles apically than at the mid-crown	subequal number of denticles apically than at the mid-crown				Unordered	New	New		?	0	0	0	?	0	0	?	[02]	2	2	9	-	?	0	0	0	0	0	?	0	?	9	0	0	0	0	0	1	1	1	0	1	2	2	9	9	0
104	Lateral teeth, size of mesial denticles relative to distal denticles (DSDI):	mesial and distal denticles of same size, 0.8 < DSDI <1.2	mesial denticles larger than distal ones, DSDI < 0.8	distal denticles larger than mesial ones, DSDI > 1.2				Unordered	Rauhut & Werner, 1995	Rauhut & Werner, 1995	Holtz, 1998 #129 ; Holtz et al., 2004 #254 ; Norell et al., 2006 #38 (modified) ; Turner et al., 2007 #247 ; ; Zanno et al., 2009 #247 ; Rauhut et al., 2009 #88	0	?	0	1	2	0	0	2	0	0	0	9	-	2	2	0	0	0	0	0	0	0	?	2	2	0	9	0	1	0	[01]	[01]	[01]	[02]	[02]	9	9	0
105	Lateral teeth, distal denticles on the apex:	contiguous over tip, or very close to the apex	distal denticles disappear well beneath apex						Harris, 1998 #45	Harris, 1998 #45		?	0	?	0	?	0	0	0	0	0	?	9	-	?	0	0	0	0	0	?	0	?	0	0	0	0	[01]	0	0	0	0	0	0	0	0	9	9	0
106	Lateral teeth, interdenticular space between mid-crown denticles on the distal carina:	narrow, less than one third of the denticle width	broad, more than one third of the denticle width						New	New		1	?	0	0	1	0	1	?	1	1	1	9	-	0	0	0	0	0	0	?	0	0	0	0	1	1	1	0	0	0	0	0	[01]	0	0	9	9	0
107	Lateral teeth, interdenticular sulci between apical denticles on the mesial carina:	absent	present, short and poorly developed, shorter than proximodistal denticle height	present, long and well-developed, equal or longer than proximodistal denticle				Unordered	Modified	Benson, 2009 #90		0	0	0	0	0	0	0	0	[01]	0	0	9	-	0	0	2	0	0	0	0	1	0	?	0	0	0	9	0	1	0	0	1	1	0	0	9	9	0
108	Lateral teeth, interdenticular sulci between mid-crown denticles on the distal carina:	absent	present, short and poorly developed, shorter than proximodistal denticle height	present, long and well-developed, equal or longer than proximodistal denticle				Unordered	Modified	Benson, 2009 #90		0	0	0	0	0	0	0	0	[012]	[01]	0	9	-	0	0	2	0	1	0	1	2	0	0	[12]	1	0	0	?	1	1	1	[12]	2	0	0	9	9	1
109	Lateral teeth, interdenticular sulci between basalmost denticles on the distal carina:	absent	present, short and poorly developed, shorter than proximodistal denticle height	present, long and well-developed, equal or longer than proximodistal denticle				Unordered	Modified	Benson, 2009 #90		0	0	0	0	0	0	0	0	[012]	0	0	9	-	0	0	?	?	0	0	1	2	0	9	[12]	0	0	0	?	1	1	1	[12]	2	0	0	9	9	0
	Ornamentations
110	Lateral teeth, flutes (i.e., subparallel longitudinal grooves separated by acute ridges) on the crown:	absent	present on the lingual surface	present on labial surface or both labial and lingual surfaces				Unordered	Modified	Sereno et al., 1998 #18 (from Bakker et al., 1988 #2)	Benson, 2009 #93	0	0	0	0	0	[03]	0	0	0	0	0	0	-	0	1	0	0	0	0	0	0	0	0	0	0	0	0	0	0	0	0	0	0	[12]	[12]	2	2	0
111	Lateral teeth, average number of flutes on the crown:	1-7	7-8	>8				Unordered	New	New		9	9	9	9	9	0	9	9	9	9	9	9	-	9	0	9	9	9	9	9	9	9	9	9	9	9	9	9	9	9	9	9	9	0	0	1	2	9
112	Lateral teeth, large transversal undulations on the crown in some teeth:	absent	present, tenuous and barely visible with light	present, pronounced and well visible with light				Unordered	Modified	Holtz, 1998 #131	Currie & Carpenter, 2000 #? ; Holtz et al., 2004 #256	2	0	1	0	1	0	0	0	[12]	2	2	0	-	0	[12]	0	0	1	2	0	2	0	0	[12]	[12]	1	0	0	0	0	[01]	2	2	0	0	0	0	1
113	Lateral teeth, large transversal undulations on the crown in some teeth when present:	just a few	numerous and closely packed						New	New		0	9	0	9	0	9	9	9	0	1	0	9	-	9	0	9	9	0	0	9	0	9	9	1	[12]	0	9	9	9	9	0	1	[01]	9	9	9	9	[01]
114	Lateral teeth, marginal undulations (i.e., short undulations adjacent to carinae) in some teeth:	absent	present and short, the mesiodistal elongation is less than four times the space separating each undulations	present and elongated, the mesiodistal elongation is longer than four times the space separating each undulations				Unordered	Modified	Modified from Currie & Carpenter, 2000 #42 ; Brusatte et al., 2007	Novas et al., 2005 #26 ; Benson, 2009 #95	0	0	0	0	0	0	0	0	1	0	0	0	-	0	0	0	0	1	0	0	1	2	0	2	0	1	0	0	1	0	0	1	1	1	1	1	0	0
115	Lateral teeth, marginal undulations in some teeth:	present and shallow, only visible with light	present and pronounced, well visible in lateral view						New	New		9	9	9	9	9	9	9	9	[01]	9	9	9	-	9	9	9	9	0	9	9	0	0	9	0	9	0	9	9	0	9	9	0	0	0	0	0	9	9
116	Lateral teeth, marginal undulations in some teeth:	present only on the mesial side of the crown	present only on the distal side of the crown	present on both mesial and distal sides				Unordered	New	New		9	9	9	9	9	9	9	9	[01]	9	9	9	-	9	9	9	9	1	9	9	1	2	9	1	9	1	9	9	0	9	9	[12]	1	1	[12]	1	9	9
117	Lateral teeth, marginal undulations in some teeth	present and mesio-distally oriented	present and diagonally oriented						New	New		9	9	9	9	9	9	9	9	[01]	9	9	9	-	9	9	9	9	0	9	9	0	0	9	0	9	1	9	9	0	9	9	[01]	0	0	[01]	[01]	9	9
118	Lateral teeth, longitudinal groove on the labial and/or lingual surface of the crown:	absent	present, a single groove centrally positioned	present, a single groove adjacent to mesial carina	present, two grooves or more			Unordered	New	New		0	0	0	0	0	0	0	0	0	0	0	0	-	0	0	0	0	0	0	0	0	0	0	0	0	0	0	0	0	0	0	0	0	0	0	0	0	0
119	Lateral teeth, elongated longitudinal and rounded ridge (differing from flutes) on the lingual surface of the crown:	absent	present, a single ridge centrally positioned	present, two or three ridges	present, several fainted ridges			Unordered	New	New		0	0	0	0	0	0	0	0	0	0	0	0	-	0	0	0	0	0	0	0	0	0	0	0	0	0	0	0	0	0	0	0	0	0	0	0	0	0
VII.	ENAMEL SURFACE TEXTURE AND MICROSTRUCTURE
120	Enamel surface texture:	smooth or irregular (non-oriented) texture	braided (oriented) texture not clearly visible with light	braided (oriented) texture clearly visible with or without light	deeply veined/anastomosed (oriented) texture			Unordered	New	New		0	0	1	0	1	1	0	1	1	1	1	?	-	0	1	0	0	0	0	0	0	0	?	[01]	1	1	0	1	1	1	1	2	2	3	3	0	3	0
121	Coarse enamel surface texture:	remains baso-apically/diagonally oriented or slightly curved basally close to the carinae	strongly curved basally close to the carinae						New	New		9	9	0	9	0	0	9	0	0	0	0	?	-	9	0	9	9	9	9	9	9	9	?	0	0	1	9	0	0	0	0	0	0	1	1	9	1	9
122	Enamel microstructure, enamel tubules:	absent or rare	common only in basal unit layer (BUL) and/or inner potion of enamel	common and extend throughout entire enamel thickness	extremely common and forming an integral structural component of enamel			Unordered	Hwang, 2007 #12	Hwang, 2007 #12		?	?	?	?	?	0	?	?	2	?	?	?	-	?	?	?	?	?	?	?	2	?	?	?	?	?	?	?	?	?	?	?	?	?	?	?	?	?
123	Enamel microstructure, predominant enamel type:	parallel crystallites	basal unit layer (BUL)	columnar				Unordered	Modified	Modified from Hwang, 2007 #13 (char. State 2 removed)		?	?	?	?	?	0	?	?	2	?	?	?	-	?	?	?	?	?	?	?	2	?	?	?	?	?	?	?	?	?	?	?	?	?	?	?	?	?
124	Enamel microstructure, predominant enamel type, percentage of enamel thickness:	≥ 75%	< 75%						Hwang, 2007 #14	Hwang, 2007 #14		?	?	?	?	?	0	?	?	0	?	?	?	-	?	?	?	?	?	?	?	0	?	?	?	?	?	?	?	?	?	?	?	?	?	?	?	?	?
125	Enamel microstructure, number of enamel types present in schmelzmuster:	one	two	three	four			Unordered	Hwang, 2007 #15	Hwang, 2007 #15		?	?	?	?	?	1	?	?	2	?	?	?	-	?	?	?	?	?	?	?	2	?	?	?	?	?	?	?	?	?	?	?	?	?	?	?	?	?
126	Enamel microstructure, number of different module types present in schmelzmuster:	one	two						Hwang, 2007 #16	Hwang, 2007 #16		?	?	?	?	?	1	?	?	1	?	?	?	-	?	?	?	?	?	?	?	1	?	?	?	?	?	?	?	?	?	?	?	?	?	?	?	?	?
127	Enamel microstructure, boundary between first and second enamel types from the enamel-dentine junction (EDJ):	parallel to EDJ	jagged, varies in distance from EDJ						Hwang, 2007 #17	Hwang, 2007 #17		?	?	?	?	?	9	?	?	0	?	?	?	-	?	?	?	?	?	?	?	0	?	?	?	?	?	?	?	?	?	?	?	?	?	?	?	?	?
128	Enamel microstructure, boundary between second and third enamel types from the enamel-dentine junction (EDJ):	parallel to EDJ	jagged, varies in distance from EDJ						Hwang, 2007 #18	Hwang, 2007 #18		?	?	?	?	?	9	?	?	0	?	?	?	-	?	?	?	?	?	?	?	0	?	?	?	?	?	?	?	?	?	?	?	?	?	?	?	?	?
129	Enamel microstructure, basal unit layer (BUL):	present	absent						Hwang, 2007 #19	Hwang, 2007 #19		?	?	?	?	?	1	?	?	0	?	?	?	-	?	?	?	?	?	?	?	0	?	?	?	?	?	?	?	?	?	?	?	?	?	?	?	?	?
130	Enamel microstructure, basal unit layer (BUL):	poorly developed	well-developed, with distinct planes of separation between adjacent units						Hwang, 2007 #20	Hwang, 2007 #20		?	?	?	?	?	9	?	?	1	?	?	?	-	?	?	?	?	?	?	?	1	?	?	?	?	?	?	?	?	?	?	?	?	?	?	?	?	?
131	Enamel microstructure, basal unit layer (BUL), maximum unit diameter:	< 10 µm	≥ 10 µm						Hwang, 2007 #21	Hwang, 2007 #21		?	?	?	?	?	9	?	?	1	?	?	?	-	?	?	?	?	?	?	?	1	?	?	?	?	?	?	?	?	?	?	?	?	?	?	?	?	?
132	Enamel microstructure, basal unit layer (BUL):	< 25% of total enamel thickness	25-50% of total enamel thickness	≥ 50% of enamel thickness				Unordered	Hwang, 2007 #22	Hwang, 2007 #22		?	?	?	?	?	9	?	?	0	?	?	?	-	?	?	?	?	?	?	?	0	?	?	?	?	?	?	?	?	?	?	?	?	?	?	?	?	?
133	Enamel microstructure, incremental lines:	absent	faint, poorly defined	well-defined				Unordered	Hwang, 2007 #23	Hwang, 2007 #23		?	?	?	?	?	0	?	?	2	?	?	?	-	?	?	?	?	?	?	?	1	?	?	?	?	?	?	?	?	?	?	?	?	?	?	?	?	?
134	Enamel microstructure, incremental lines:	present in one section of the schmelzmuster only	present in more than one section of the schmelzmuster but not throughout entire schmelzmuster	present throughout entire schmelzmuster				Unordered	Hwang, 2007 #24	Hwang, 2007 #24		?	?	?	?	?	9	?	?	0	?	?	?	-	?	?	?	?	?	?	?	0	?	?	?	?	?	?	?	?	?	?	?	?	?	?	?	?	?
135	Enamel microstructure, columnar units closest to the enamel-dentine junction (EDJ), shape of units in cross-sections:	polygons with sharp corners and more than 4 sides	subcircular or polygons with rounded corners and more than 4 sides	triangles and/or rectangles with sharp corners				Unordered	Hwang, 2007 #27	Hwang, 2007 #27		?	?	?	?	?	9	?	?	2	?	?	?	-	?	?	?	?	?	?	?	2	?	?	?	?	?	?	?	?	?	?	?	?	?	?	?	?	?
136	Enamel microstructure, columnar units closest to the enamel-dentine junction (EDJ):	extend straight and unbroken to the OES or to within 20 µm below the OES	end, split, or are interrupter less than two-thirds of the distance from the EDJ to OES						Hwang, 2007 #28	Hwang, 2007 #28		?	?	?	?	?	9	?	?	0	?	?	?	-	?	?	?	?	?	?	?	0	?	?	?	?	?	?	?	?	?	?	?	?	?	?	?	?	?
137	Enamel microstructure, columnar units closest to the enamel-dentine junction (EDJ), maximum unit diameter:	< 15 µm	≥ 15µm						Hwang, 2007 #29	Hwang, 2007 #29		?	?	?	?	?	9	?	?	0	?	?	?	-	?	?	?	?	?	?	?	0	?	?	?	?	?	?	?	?	?	?	?	?	?	?	?	?	?
138	Enamel microstructure, columnar units closest to the outer enamel surface (OES):	no dominant direction of orientation, planes of separations equally well-developed in all directions	distinct longitudinal orientation, planes of separation better developed in an apicobasal (longitudinal) direction						Hwang, 2007 #33	Hwang, 2007 #33		?	?	?	?	?	9	?	?	0	?	?	?	-	?	?	?	?	?	?	?	0	?	?	?	?	?	?	?	?	?	?	?	?	?	?	?	?	?
139	Enamel microstructure, ratio of thickest enamel type in schmelzmuster divided by second thickest enamel type:	> 7	1.3 to 7	1 to 1.3				Unordered	Hwang, 2007 #39	Hwang, 2007 #39		?	?	?	?	?	9	?	?	0	?	?	?	-	?	?	?	?	?	?	?	0	?	?	?	?	?	?	?	?	?	?	?	?	?	?	?	?	?
VIII.	ROOT
140	Root, shape in lateral view:	with subparallel mesial and distal margins	with convex margins, root significantly larger than base crown						New	New		?	0	?	?	?	?	0	0	0	?	?	0	-	?	0	0	?	?	0	?	0	0	1	0	0	0	1	?	0	0	0	?	0	0	?	?	0	?
141	Root, distal shape in lateral view:	broad	strongly tapered apically						Sereno et al., 1998 #21 ; Charig & Milner, 1997	Sereno et al., 1998 #21 ; Charig & Milner, 1997	Benson, 2009 #94	?	0	?	?	?	?	0	0	0	?	?	[01]	-	?	0	?	?	?	?	?	0	0	0	0	0	?	?	?	?	0	0	?	0	1	?	?	1	?
142	Root, outline of mid-root in cross section:	oval to subcircular	8-shape (i.e., longitudinal depression centrally positioned on both lingual and labial margins)	bean-shaped (i.e., longitudinal depression centrally positioned on one side only)				Unordered	New	New		?	?	?	?	?	?	1	1	?	?	?	?	-	?	1	?	?	?	0	?	?	?	?	1	?	?	?	?	1	0	?	?	2	0	?	?	0	?
143	Root, form of the resorption pit in lingual view	deep and well-delimited depression	shallow concavity or absent						New	New		?	?	?	?	?	?	?	0	0	?	?	?	-	?	1	?	?	?	?	?	1	1	?	1	1	1	?	?	?	?	1	?	1	1	?	?	1	?
144	Root, transversal undulations below the cervix in some crowns:	absent	present						New	New		?	?	?	?	0	?	0	0	0	?	?	?	-	?	0	?	?	?	1	?	?	?	0	0	?	?	0	?	0	0	0	?	0	1	?	?	?	?
145	Root, apicobasal height in lateral view:	less than twice the apicobasal height of the crown	twice or more the apicobasal height of the crown						New	New		?	?	?	?	?	?	?	0	0	?	?	0	-	?	0	?	?	?	?	?	?	0	0	0	0	?	?	?	?	0	0	?	0	1	?	?	[01]	?
[truncated: 65 more columns]

## Sheet: Data matrix
C.H. Data Matrix		1	2	3	4	5	6	7	8	9	10	11	12	13	14	15	16	17	18	19	20	21	22	23	24	25	26	27	28	29	30	31	32	33	34	35	36	37	38	39	40	41	42	43	44	45	46	47	48
1	Herrerasaurus	0	1	0	0	0	0	0	0	0	0	0	0	0	0	0	0	0	0	1	1	0	0	0	0	0	0	0	2	0	0	0	1	0	0	0	0	1	0	-	1	1	2&3	1	0	0	0	0	-
2	Daemonosaurus	0	0	?	0	0	0	1	1	0	0	2	1	?	0	0	1	1	0	4	1	2	0	0	0	?	0	0	?	0	1	0	1	0	1	0	0	?	0	-	1	?	2&3	0	0	0	0	1	1
3	Eodromaeus	0	1	?	?	?	?	?	?	?	?	?	?	?	0	0	0	?	0	4	1	0	?	0	0	0	?	0	3	0	?	?	1	0	0	0	0	0	?	?	?	?	?	?	?	?	?	?	?
4	Eoraptor	0	1	0	1	0	0	0	0	0	0	0	0	?	0	0	1	0	0	1	1	0	0	0	0	?	0	0	?	?	?	?	?	?	?	?	?	0	1	0	0	1&2	1&2	1	0	0	0&1	0&1	1
5	Dracovenator	0	1	1	1	1	0	0	?	?	1	0	1	0	0	2	0	0	?	?	?	?	?	?	0	0	?	?	?	0	?	?	?	?	?	?	?	?	0	-	1	0	2	1	0	1	0	1	1
6	Coelophysis	0	1	0	?	0	0	0	0	0	0	0	0	0	0	1	1	0	0	0	1	0	1	1	0	0	0	0	0	0	1	0	?	?	0	0	0	1	0	-	0	0&1	0&1&2	1	0	0	0	0&1	1
7	Liliensternus	?	?	?	?	?	?	?	?	?	?	?	?	?	?	?	?	?	0	?	?	?	?	?	0	0	?	0	1	0	0	1	0	1	0	0	0	1	0	-	0	1	?	1	0&1	0	0	1	1
8	Dilophosaurus	0	1	1	1	0	0	0	0	0	1	0	1	0	0	2	2	0	0	4	1	1	1	1	0	0	1	0	2	0	1	1	1	1	0	0	0	?	0	-	1	1	0&1	0	0	0	0	1	1
9	Ceratosaurus	0	0	1	1	1	-	0	0	0	0	0	0	0	0	0	0	0	0	3&4	1	1	1	0	0	0	0	0	2&3	0	0	1	1	0	0	0	0	1	0	-	1	1&2	3	0&1	0&1	0	0	1	1
10	Genyodectes	0	1	1	1	1	1	0	0	0	0	0	0	0	0	0	0	0	0	?	?	1	1	0	0	0	?	0	3	0	0	1	1	0	0	0	0	?	0	-	2	0&1	0&1&2	0	0	0	0	1	1
11	Berberosaurus	?	?	?	?	?	?	?	?	?	?	?	?	?	?	?	?	?	?	?	?	?	?	?	?	?	?	?	?	?	?	?	?	?	?	?	?	?	?	?	?	?	?	?	?	?	?	?	?
12	Limusaurus_juvenile	1&2	0	-	-	-	-	-	-	1&2	-	-	-	0	0	0	0	-	0&1	5	0	1	0	0	0	0	2	1&2	3	0	0	0	1	0	0	0	0	1	0	-	0	?	?	0&1	?	?	?	0	-
13	Limusaurus_adult	3	-	-	-	-	-	-	-	-	-	-	-	-	-	-	-	-	3	-	-	-	-	-	-	-	-	3	-	-	-	-	-	-	-	-	-	1	-	-	-	-	-	-	-	-	-	-	-
14	Noasaurus	?	?	?	?	?	?	?	?	?	?	?	?	?	?	?	?	?	0	4	1	0	1	0	0	0	?	?	?	?	?	?	?	?	?	?	?	?	?	?	?	?	?	?	?	?	?	?	?
15	Masiakasaurus	0	?	1	1	?	?	?	1	?	0	?	?	?	?	?	?	?	0	?	1	0	?	0	0	0	?	0	3	0	0	0	0	0	1	0	0	?	2	1	0	2&3	0&1	1	0	2	3	1	0&1
16	Kryptops	?	?	?	?	?	?	?	?	?	?	?	?	?	?	?	?	?	0	?	?	0	?	0	0	1	?	?	?	?	?	?	?	?	?	?	?	?	?	?	?	?	?	?	?	?	?	?	?
17	Rugops	0	1	0	0	0	0	0	?	1	?	0	0	1	0	0	0	0	0	?	1	1	1	0	0	1	?	?	?	?	?	?	?	?	?	?	?	?	?	?	?	1	?	?	?	2	?	1	1
18	Abelisaurus	0	1	?	0	0	0	?	?	?	?	?	?	?	0	0	0	0	0	?	?	?	?	0	0	?	?	?	?	?	?	?	?	?	?	?	?	?	0	-	1	1	3	1&2	1&2	2	3	1	1
19	Aucasaurus	0	1	?	0	0	0	?	?	1	?	0	0	?	0	0	0	0	0	4	1	0	1	0	0	1	?	?	?	?	?	?	?	?	?	?	?	?	?	?	?	?	?	?	?	?	?	?	?
20	Indosuchus	0	1	0	0	0	0	0	1	1	0	0	0	1	0	0	0	0	0	4	0	0	1	0	0	1	?	0	?	0	?	1	0	0	0	0	0	?	0	-	1	1&2	3	1&2	1&2	2&3	2&3	1	1
21	Majungasaurus	0	1	0	0	0	0	0	1	1	0&1	0	0	1	0	0	0	0	0	2	1	1	1	0	0	1	1	0	2	0	2	1	0	0	0	0	0	1	0&1	0	1	1&2	3	1&2	1&2	2&3	2&3	1	1
22	Skorpiovenator	0	1	?	?	?	?	?	?	?	?	?	?	?	0	0	0	0	0	1	1	0	?	0	0	?	1	0	?	?	?	?	?	?	?	?	?	?	0	-	1	1	2	2	2	?	3	1	1
23	Chilesaurus	0	1	?	?	?	?	?	?	?	?	?	?	?	0	?	0	1	?	?	?	?	?	0	2	?	?	0	?	?	?	?	0	0	1	1	0	?	2	1	0	?	1	2	2	?	0	0	-
24	Piatnitzkysaurus	?	?	?	?	?	?	?	?	?	?	?	?	?	?	?	?	?	0	1	?	0	0	0	0	0	?	0	?	0	?	?	?	0	0	0	0	?	?	?	?	?	?	?	?	?	?	?	?
25	Marshosaurus	0	1	1	1	1	0	0	0	0	0	0	0	0	0	0	0	0	0	2	1	0	1	0	0	0	?	0	1	0	0	1	1	0	0	0	0	?	0	-	1	1	2	1	0&1	1	0	1	1
26	Monolophosaurus	0	1	?	?	0	0	0	?	0	?	0	0	?	0	0	0	0	0	4	1	0	?	0	0	?	2	0	1	0	0	0	1	0	0	0	0	1	0	-	1	1	2&3	0&1	0	1	0	1	?
27	Sciuruminus	0	1	?	1	0	0	0	0	0	0	0	0	?	0	?	0	0	0	?	1	1	?	0	0&3	?	2	0	3	0	0	1	1	0	1	0	0	?	0	-	0	?	1&2	0&1	0	?	?	0	-
28	Eustreptospondylus	0	1	1	1	1	0	?	0	0	0	0	?	0	0	0	0	0	0	?	?	?	?	0	0	0	?	0	3	0	0	1	1	1	0	0	0	?	?	?	1	?	?	1	0	?	0	1	1
29	Afrovenator	?	?	?	?	?	?	?	?	?	?	?	?	?	?	?	?	?	0	4	1	0	1	0	0	0	2	?	?	?	?	?	?	?	?	?	?	?	?	?	?	?	?	?	?	?	?	?	?
30	Dubreuillosaurus	0	1	1	1	1	0	0	0	0	0	0	0	0	0	0	0	0	0	4	1	0	1	0	0	0	2	0	3	0	0	1	1	0	0	0	0	1	0	-	1	1	2	1	0	1	0	1	1
31	Duriavenator	0	?	1	1	?	?	?	0	?	0	?	?	0	0	?	?	0	0	?	1	0	1	0	0	0	?	0	?	0	0	1	0	0	0	0	0	?	0	-	?	1	2	?	?	1	?	1	1
32	Megalosaurus	0	?	?	?	?	?	?	?	?	?	?	?	?	?	?	?	?	0	4	1	0	1	0	0	0	?	0	3	0	0	1	0	0	0	0	0	1	?	?	?	?	?	?	?	?	?	?	?
33	Torvosaurus	0	0	1	1	1	-	0	0	0	0	0	0	0	0	0	0	0	0	4	1	0	1	0	0	0	2	0	3	0	?	?	1	0	0	0	0	1	?	?	2	1	?	?	?	1	0	1	1
34	Baryonyx	0	3&4	1	1	1	0	1	1	0	0	1	1	0	1	2	0	0	0	?	1	0	0	1	0	2	?	0	0	0	1	1	1	1	0	0	0	1	0	-	1	2	1&2	1	0	0	0	1	1
35	Suchomimus	0	4	1	1	1	0	1	1	0	0	1	1	0	1	2	0	0	0	0	1	0	0	1	0	2	2	0	0	0	1	1	1	1	?	0	0	1	0	-	?	?	?	1	0	0	0	1	1
36	Irritator_Angaturama	0	4	1	0	0	0	1	?	?	0	2	1	0	1	2	1	0	0	?	?	?	?	?	1	2	2	0	?	0	?	?	?	?	?	?	?	1	?	?	?	?	?	?	?	?	?	?	?
37	Spinosaurus	0	3	1	2	0&1	0	1	1	0	1	2	1	0	1	2	2	0	0	4	1	0	0	1	1	2	3	0	2	0	1	1	1	1&2	1	0	0	1	0	-	?	1&2	?	?	1	0	0	1	0
38	Erectopus	?	?	?	?	?	?	?	?	?	?	?	?	?	?	?	?	?	?	?	?	?	?	0	0	0	?	?	?	?	?	?	?	?	?	?	?	?	?	?	?	?	?	?	?	?	?	?	?
39	Sinraptor	0	1	1	1	1	1	0	0	0	0	0	0	0	0	0	0	0	0	3&4	0	1	0	0	0	0	2	0	2	0	0	?	1	0	0	0	0	1	0	-	1	1&2&3	?	1	1	2&3	1&3	1	1
40	Allosaurus	0	2	1	1	1	0	0	1	1	0	0	0	0	0	0	0	0	0	2&3	0	0	1	0	0	0	2	0	2	0	1	0&1	1	0	0	0	0	1	0	-	1	2&3	0&1&2	0&1	0&1	2&3	2&3	1	1
41	Neovenator	0	2	1	1	1	1	2	0	1	1	2	0	0	0	0	0	0	0	3	1	0	0	0	0	0	?	0	?	0	0	1	1	0	0	0	0	1	?	?	?	?	?	?	?	?	?	?	?
42	Fukuiraptor	?	?	?	?	?	?	?	?	?	?	?	?	?	?	?	?	?	?	?	?	?	?	0	0	0	?	0	?	0	?	1	?	?	0	0	0	?	0	-	1	1&2	?	0	0	3	0	1	1
43	Australovenator	?	?	?	?	?	?	?	?	?	?	?	?	?	?	?	?	?	?	?	?	?	?	?	?	?	?	0	1	0	0	1	?	0	0	0	0	?	0	-	1	1&2	2&3	0	0	?	3	1	1
44	Megaraptor	0	?	1&2	1	1	?	?	0	?	0	?	?	0	0	?	?	0	0	3	0	1	0	0	0	0	2	?	?	?	?	?	?	?	?	?	?	?	?	?	?	?	?	1	0	?	3	1	0
45	Orkoraptor	?	?	?	?	?	?	?	?	?	?	?	?	?	?	?	?	?	?	?	?	?	?	?	?	?	?	?	?	?	?	?	?	?	?	?	?	?	?	?	?	?	?	?	?	?	?	?	?
46	Acrocanthosaurus	0	1	1	1	1	1	0	0	0	0	0	0	0	0	0	0	0	0	3	1	0	1	0	0	0	2	0	2	0	0	1	1	0	0	0	0	1	0	-	2	1&2	1&2	1	0	0	0	1	1
47	Eocarcharia	?	?	?	?	?	?	?	?	?	?	?	?	?	?	?	?	?	0	3	1	0	?	0	0	0	?	?	?	?	?	?	?	?	?	?	?	?	?	?	?	?	?	?	?	?	?	?	?
48	Carcharodontosaurus	?	?	?	?	?	?	?	?	?	?	?	?	?	?	?	?	?	0	4	0	0	1	0	0	0	2	0	?	0	?	1	?	0	0	0	0	?	?	?	?	?	?	?	?	?	?	?	?
49	Giganotosaurus	0	1	1	1	1	1	0	1	1	1	1	?	0	0	0	0	0	0	?	?	0	?	0	0	0	?	0	2	0	0	1	?	0	0	0	0	1	0	-	0	2	?	1	1	0	0	1	1
50	Mapusaurus	?	?	?	?	?	?	?	?	?	?	?	?	?	?	?	?	?	0	4	1	0	1	0	0	0	?	0	?	0	?	?	?	0	0	0	0	?	0	-	1	2	2&3	1	0	0	0	1	1
51	Bicentenaria	?	?	?	0	0	0	?	?	?	0	0	?	0	?	?	?	0	?	?	?	?	?	?	0	?	?	?	?	?	?	?	?	?	?	?	?	?	0	-	?	1&2	?	?	?	0	0	?	?
52	Proceratosaurus	0	1	1	1	1	1	0	0	0	0	0	0	0	0	0	0	0	0	0	1	1	1	0	0	?	2	0	1	0	2	1	1	0	1	0	0	1	1	0	0	?	2&3	1	0	3	0&3	1	1
53	Eotyrannus	0	1	2	1	1	1	0	0	0	0	0	0	0	0	0	0	0	?	?	?	1	0	0	0	1	?	0	?	0	2	1	0	0	0	0	0	?	0	-	1	3	1	1	0&1	4	3	1	1
54	Raptorex	0	1	2	1	1	1	0	0	0	0	0	0	0	0	0	0	0	0	4	0	0	1	0	0	0	2	0	2	0	2	1	1	0	0	0	0	1	0	-	0	3	0&1	1	0	4	2	1	1
55	Gorgosaurus	0	1	2	2	1	1	0	0	0	0	0	0	0	0	0	0	0	0	3&4	0	1	1	0	0	0	2	0	2	0	0	1	1	0	0	0	0	1	0	-	1	2&3	0&1&2&3	1	1	4	2	1	1
56	Alioramus	?	?	?	?	?	?	?	?	?	?	?	?	?	?	?	?	?	0	2	1	1	1	0	0	0	2	0	1	0	2	1	1	0	0	0	0	1	?	?	?	?	?	?	?	?	?	?	?
57	Daspletosaurus	0	1	2	2	1	1	0	0	0	0	0	0	0	0	0	0	0	0	2&3&4	0&1	1	0	0	0	0	2	0	2	0	0	1	1	0	0	0	0	1	0	-	1	3	0&1	1	1	4	2	1	0&1
58	Tyrannosaurus	0	1	2	2	1	1	0	0	0	0	0	0	0	0	0	0	0	0	4	1	1	1	0	0	0	2	0	3	0	2	1	1	0	0	0	0	1	0	-	2	3	3	0&1	0	4	0&2	1	1
59	Compsognathus	0	1	?	1	0	0	?	0	0	0	?	1	?	0	?	?	0	0	2	1	0	?	0	0	?	2	0	1	0	0	?	1	0	0	0	0	1	0	-	0	?	3	0&1&2	0	?	0	0	-
60	Juravenator	0	1	?	?	0	0	?	0	0	?	0	1	?	0	?	0	0	0	5	1	0	0	0	0	?	2	?	3	?	?	?	?	?	?	?	?	?	0	-	0	?	0&1&2	0	0	?	?	0	-
61	Scipionyx	0	2	?	1	0	0	-	1	1	1	2	2	?	0	0	1	0	0	5	1	0	0	0	0	?	2	0	3	0	0	1	1	0	0	0	0	1	0	-	?	?	2	0	0	0	?	0	-
62	Ornitholestes	0	1	1	1	0	0	1	2	0&2	0	2	1	?	0	0	0	1	0	4	1	0	1	0	0	0	2	0	3	0	0	0	1	0	1	0	0	1	1	0	0	1&2&3	2	1	0&1	3&4	0&3	0&1	0
63	Nqwebasaurus	?	?	?	?	?	?	?	?	?	?	?	?	?	?	?	?	?	2	?	?	?	?	0	2	3	4	?	?	?	?	?	?	?	?	?	?	?	?	?	?	?	?	?	?	?	?	?	?
64	Pelecanimimus	0	4	?	?	?	?	?	?	?	?	?	?	0	0	0	0	0	2	0	?	?	?	0	0	3	4	0	0	1	1	?	1	0	0	0	0	1	1	1	0	?	?	1	0&1	3	?	0	-
65	Shenzhousaurus	3	-	-	-	-	-	-	-	-	-	-	-	-	-	-	-	-	3	-	-	-	-	-	-	-	-	2	3	0	-	?	-	0	1	1	0	1	0	-	0	2	?	2	2	0	0	0	-
66	Garudimimus	3	-	-	-	-	-	-	-	-	-	-	-	-	-	-	-	-	3	-	-	-	-	-	-	-	-	3	-	-	-	-	-	-	-	-	-	1	-	-	-	-	-	-	-	-	-	-	-
67	Struthiomimus	3	-	-	-	-	-	-	-	-	-	-	-	-	-	-	-	-	3	-	-	-	-	-	-	-	-	3	-	-	-	-	-	-	-	-	-	1	-	-	-	-	-	-	-	-	-	-	-
68	Haplocheirus	0	1	?	?	0	0	0	0	0	0	0	0	0	0	0	0	0	0	0	1	2	?	0	0	0&2	2	0	0	0	?	1	?	0	0	0	0	1	0	0	0	?	2	1	0	0	0	0	-
69	Shuvuuia	?	?	?	?	?	?	?	?	?	?	?	?	?	?	?	?	?	2	0	0	0	1	0	0	3	4	0	0	1	0	0	0	0	0	0	0	?	1	1	0	2	?	2	2	0	0	0	-
70	Mononykus	?	?	?	?	?	?	?	?	?	?	?	?	?	?	?	?	?	?	?	?	?	?	?	?	?	?	?	?	?	?	?	?	?	?	?	?	?	?	?	?	?	?	?	?	?	?	?	?
71	Eshanosaurus	?	?	?	?	?	?	?	?	?	?	?	?	?	?	?	?	?	?	?	?	?	?	?	?	?	?	0	0	0	1	?	?	0	?	0	0	?	?	?	?	?	?	?	?	?	?	?	?
72	Falcarius	?	?	?	?	?	?	?	?	?	?	?	?	?	?	?	?	?	0	?	1	0	0	0	0	2	?	0	0	0	?	?	?	0	0	0	0	1	1	0	0	2	2&3	2	2	0	0&5	0	0
73	Jianchangosaurus	3	-	-	-	-	-	-	-	-	-	-	-	-	-	-	-	-	0	0	0	0	?	0	0	?	2	?	0	0	0	0	-	0	0	0	0	?	2	1	1	2	2	1	0	0	4	1	1
74	Erlikosaurus	3	-	-	-	-	-	-	-	-	-	-	-	-	-	-	-	-	1	0	?	?	?	0	0	?	2	1	0	0	1	0	?	0	1	0	0	1	1	0	0	2	2	2	2	0	0	0	-
75	Incisivosaurus	0	1	0	0	0	0	1	2	2	2	0	1	0	0	0	0	0	0	5	1	0	1	0	0	0	2	1	3	0&1	0	0	?	0	1	1	0	1	0	0	1	?	2	2	1&2	0	0	1	0
76	Caudipteryx	1	1	?	?	?	?	?	-	-	?	?	?	?	1	0	0	1	3	-	-	-	-	-	-	-	-	3	-	-	-	-	-	-	-	-	-	1	0	-	0	?	0	0&2	0&1	?	-	0	-
77	Chirostenotes	3	-	-	-	-	-	-	-	-	-	-	-	-	-	-	-	-	3	-	-	-	-	-	-	-	-	3	-	-	-	-	-	-	-	-	-	1	-	-	-	-	-	-	-	-	-	-	-
78	Citipati	3	-	-	-	-	-	-	-	-	-	-	-	-	-	-	-	-	3	-	-	-	-	-	-	-	-	3	-	-	-	-	-	-	-	-	-	1	-	-	-	-	-	-	-	-	-	-	-
79	Halszkaraptor	0	4	1	1	1	1	0	0	0	0	0	0	0	0	0	0	0	0	0	0	1	?	0	0	0	1	0	1	0	?	?	?	0	?	?	?	1	1	?	0	?	?	0	0	3	-	0	-
80	Buitreraptor	?	?	?	?	?	?	?	?	?	?	?	?	?	?	?	?	?	0	?	?	?	?	?	0	0	2	0	?	0	?	?	0	0	0	0	0	?	?	?	?	?	?	?	?	?	?	?	?
81	Microraptor	0	1	1	0	0	0	1	0	0	0&1	2	0	?	0	0	0	0	0	4	0	1	?	0	0	?	2	0	?	0	?	1	1	0	0&1	0	0	1	0	-	0	?	1&2	0&1	0	?	0&3	0	-
82	Sinornithosaurus	0	1	1	0	0	0	1	0	1	0	2	0	?	0	0	0	0	0	?	0	1	0	0	0	?	2	0	?	0	0	1	1	0	1	0	0	1	0	-	0	?	2&3	0&1	0	?	2&3	1	0&1
83	Dromaeosaurus	0	?	?	?	?	0	0	?	1	?	?	0	0	0	0	0	0	0	5	0	0	1	0	0	0	2	0	3	0	0	1	0	0	0	0	0	1	0	-	1	1&2&3	1&2	0&1	0	3	1&3	1	1
84	Atrociraptor	0	1	0	0	0	0	0	0	0	?	2	0	0	0	0	0	0	0	4	0	0	1	0	3	?	2	0	3	0	0	1	1	0	0	0	0	?	0	-	0&1	1	2&3	1	1	3	1&3	1	1
85	Bambiraptor	0	1	?	?	0	0	?	?	?	?	?	?	0	0	0	0	0	0	4	?	?	?	0	3	?	2	0	3	0	?	1	0	0	0	0	0	?	?	?	?	?	?	?	?	?	?	?	?
86	Tsaagan	0	1	1	1	0	0	1	1	0	0	2	1	?	0	0	0	0	0	4	0	0	?	0	0	?	2	0	2&3	0	0	1	0	0	0	0	0	1	0	-	1	?	3	0&1	0&1	0	0	0	-
87	Velociraptor	0	1	1	0	0	0	1	1	0	?	2	1	?	0	0	0	0	0	3&4	1	0	?	0	0	?	2	0	2&3	0	0	1	1	0	0	0	0	1	0	-	0	0	3	1	0	3	0	0	-
88	Deinonychus	0	1	0	0	0	0	1	1	0	0	0	1	0	0	0	0	0	?	3	?	1	1	0	3	0	2	0	2	0	0	0	0	0	0	0	0	1	0	-	0	1	2&3	1	0&1	1&3	3	1	1
89	Saurornitholestes	0	1	?	?	?	?	?	?	?	?	?	?	?	?	?	0	0	?	?	1	0	1	0	0	0	?	0	2	0	0	0	1	0	1	0	0	?	0	-	0	0	2	0&1	0&1	3	3	1	0&1
90	MPC-D100_1128	0	?	?	?	1	?	?	?	?	?	0	?	0	0	0	?	0	2	0	?	?	?	?	0	?	3	0	0	1	?	?	0	0	?	0	0	?	1	1	0	2	2	2	2	0	0	0	-
91	Almas	0	1	?	?	0	0	0	0	0	?	?	0	?	0	0	0	0	2	2	2	1	1	0	0	?	3	0	1	1	2	1	0	0	0	0	1	?	1	1	0	?	2	2	2	0	0	0	-
92	Sinusonasus	0	?	?	?	?	0	?	?	1	?	?	0	?	0	0	0	0	0	1	2	1	?	0	0	?	2	0	0&1	?	2	0	1	0	?	0	1	?	1&2	1	0	?	3	1&2	0&2	?	?	0	-
93	Byronosaurus	0	1	0	1	0	0	0	1	1	0	?	0	0	0	0	0	0	2	0	2	1	1	0	0	?	2	0	0	1	0	0	?	0	0	0	1	?	1	0	0	?	2	1	1	0	1	0	-
94	Zanabazar	0	1	0	1	0	0	0	0	0	0	0	0	0	0	0	0	0	0	0&1	2	1	1	0	0	0	3	0	0	1	0	0	1	0	0	0	1	1	1	1	0	?	3	1	1	2	?	1	1
95	Troodon	0	1	?	?	?	?	?	?	?	?	?	?	?	?	?	?	?	?	?	?	?	?	?	?	?	?	0	0	1	0	0	?	0	0	0	1	1	2	1	0	2	2	1	0	5	0	0&1	0&1
96	Epidexipteryx	0	1	?	0	0	0	1	2	1	0	2	0	?	0	?	0	1	2	5	-	-	1	1	2	?	?	2	3	?	1	2	0	0	1	1	0	?	0	-	0	?	0	0&1	0	?	0	0	-
97	Archaeopteryx	0	1	?	0	0	0	0	1	1	0	0	0	?	0	0	0	0&1	0	5	0	0	1	0	0	?	3	0	3	0	0	1	0	0	0	0&1	0	1	1	0	0	?	3	1	0	?	0	0	-
98	GLAHM_125390a_mesial	?	?	?	?	?	?	?	?	?	?	?	?	?	?	?	?	?	?	?	?	?	?	?	?	?	?	?	?	?	?	?	?	?	?	?	?	?	?	?	1	1	3	1	0	?	?	?	?
99	GLAHM_125390a_lateral	?	?	?	?	?	?	?	?	?	?	?	?	?	?	?	?	?	?	?	?	?	?	?	?	?	?	?	?	?	?	?	?	?	?	?	?	?	?	?	?	?	?	?	?	?	?	?	?
100	Large_Skye_tooth_mesial	?	?	?	?	?	?	?	?	?	?	?	?	?	?	?	?	?	?	?	?	?	?	?	?	?	?	?	?	?	?	?	?	?	?	?	?	?	?	?	1	0&1	2	0	0	?	?	1	1
101	Large_Skye_tooth_lateral	?	?	?	?	?	?	?	?	?	?	?	?	?	?	?	?	?	?	?	?	?	?	?	?	?	?	?	?	?	?	?	?	?	?	?	?	?	?	?	?	?	?	?	?	?	?	?	?
102	Small_Skye_tooth_mesial	?	?	?	?	?	?	?	?	?	?	?	?	?	?	?	?	?	?	?	?	?	?	?	?	?	?	?	?	?	?	?	?	?	?	?	?	?	?	?	?	?	?	?	0&1	?	?	0	-
103	Small_Skye_tooth_lateral	?	?	?	?	?	?	?	?	?	?	?	?	?	?	?	?	?	?	?	?	?	?	?	?	?	?	?	?	?	?	?	?	?	?	?	?	?	?	?	?	?	?	?	?	?	?	?	?
[truncated: 97 more columns]

## Sheet: Character states
	Characters	0	1	2	3	4	5
1	Premaxillary teeth	present in the anterior and posterior portions of the premaxilla	absent in the posterior portion of the premaxilla	absent in the anterior portion of the premaxilla	absent in the whole premaxilla, toothless premaxilla
2	Number of premaxillary teeth (or alveoli)	3 or less	4	5	6	7 or more
3	Premaxillary alveoli, direction of main axis of elongation in palatal view	all alveoli mesio-distally oriented	anterior alveoli labio-lingually oriented, posterior alveoli mesio-distally oriented	all alveoli labio-lingually oriented
4	Premaxillary alveoli, overlap of the first and second alveoli in palatal view	absent	present, partial	present, almost complete
5	Premaxillary alveoli, overlap of the second and third alveoli in palatal view	absent	present
6	Premaxillary alveoli, overlap of the third and fourth alveoli in palatal view	absent	present
7	Premaxillary teeth (or alveoli), size	all approximately equal in size	posterior teeth (or alveoli) smaller than anterior teeth (or alveoli)	anterior teeth (or alveoli) smaller than posterior teeth (or alveoli)
8	Anterior premaxillary teeth (or alveoli), size	significantly smaller than the first six anterior maxillary teeth (or alveoli)	subequal in size than the first six anterior maxillary teeth (or alveoli)	significantly larger than the first six anterior maxillary teeth (or alveoli)
9	Posterior premaxillary teeth (or alveoli), size	significantly smaller than the first six anterior maxillary teeth (or alveoli)	subequal in size than the first six anterior maxillary teeth (or alveoli)	significantly larger than the first six anterior maxillary teeth (or alveoli)
10	First premaxillary tooth (or alveolus), size	subequal in size than second tooth (or alveolus)	significantly smaller than second tooth (or alveolus)	significantly bigger than second tooth (or alveolus)
11	Second premaxillary tooth (or alveolus), size	subequal in size than third (and fourth) premaxillary tooth (or alveolus)	significantly smaller than third (and fourth) tooth (or alveolus)	significantly larger than third (and fourth) tooth (or alveolus)
12	Posteriormost premaxillary tooth (or alveolus), mesiodistal length in palatal view	subequal in size than more anterior teeth (or alveoli)	significantly smaller than more anterior teeth (or alveoli)	significantly larger than anterior teeth (or alveoli)
13	Distal premaxillary alveoli, shape in palatal view	oval to subcircular	subrectangular
14	Premaxillary tooth row, posterior extension (position of posteriormost premaxillary tooth)	aligned (ventral) to external naris	anterior to external naris
15	Premaxilla in palatal view	unconstricted	slightly constricted	strongly constricted, terminal rosette of premaxilla
16	Subnarial gap/diastema (i.e., posterior part of premaxillary alveolar margin unedentelous, resulting in an interruption of the upper tooth row)	absent	present and short, diastema not extensive enough to host more than one tooth	present and long, diastema extensive enough to host more than one tooth
17	First premaxillary alveoli open	ventrally, decumbent teeth	anteroventrally, procumbent teeth
18	Maxillary teeth	present in the anterior and posterior portions of the maxilla (posteriormost portion excluded)	absent in the anteriormost portion of the maxilla	absent in the posterior portion of the maxilla (i.e., tooth row extending only on the anterior 75% of the bone or less)	absent in the whole maxilla, toothless maxilla
19	Number of maxillary teeth (or alveoli)	>19	18-19	16-17	15	10-14	1-9
20	Anterior maxillary teeth (or alveoli), size	subequal in size than posterior teeth (or alveoli)	significantly larger than posterior maxillary teeth (or alveoli)	significantly smaller than posterior maxillary teeth (or alveoli)
21	Mid-maxillary teeth (or alveoli), mesiodistal length	subequal in size than anteriormost maxillary teeth (or alveoli)	significantly larger than anteriormost maxillary teeth (or alveoli)	significantly smaller than anteriormost maxillary teeth (or alveoli)
22	First maxillary tooth (or alveolus), size	significantly smaller than second tooth (or alveolus)	subequal in size than second tooth (or alveolus)
23	First maxillary teeth (or alveoli) open	ventrally, decumbent teeth	anteroventrally, procumbent teeth
24	Mid-maxillary teeth, inclination	pointing ventrally (decumbent)	pointing lateroventrally (laterocumbent)	pointing anteroventrally (procumbent)	pointing posteroventrally (retrocumbent)
25	Maxillary alveoli, shape in palatal view	oval to lenticular	subrectangular	circular	merged to form an open alveolar groove (interdental septa absent)
26	Maxillary tooth row, posterior extension (position of posteriormost tooth)	posterior to the anteriormost rim of orbit	anterior or aligned to the anteriormost rim of orbit, posterior to the posteriormost rim of antorbital fenestra	anterior or aligned to the posteriormost rim of antorbital fenestra, posterior to the anteriormost rim of antorbital fenestra	aligned to the anteriormost rim of antorbital fenestra	anterior to the anteriormost rim of the antorbital fenestra
27	Dentary teeth	present in the anterior and posterior portions of the dentary	absent in the anteriormost portion of the dentary	absent in the posterior portion of the dentary (i.e., tooth row extending only on the anterior 75% of the bone or less)	absent in the whole dentary, toothless dentary
28	Number of dentary teeth (or alveoli)	> 25	18-25	15-17	< 15
29	Dentary alveoli in dorsal view	in separate alveoli	merged to form an open alveolar groove (interdental septa absent)
30	Anteriormost dentary teeth (or alveoli), size	subequal in size than mid- and posterior dentary teeth (or alveoli)	significantly larger than mid- and posterior dentary teeth (or alveoli)	significantly smaller than mid- and posterior dentary teeth (or alveoli)
31	First dentary tooth (or alveolus), size in comparison to second and third dentary alveoli	subequal in size	first tooth (or alveolus) substantially smaller	first tooth (or alveolus) substantially larger
32	Mid-dentary teeth (or alveoli), size	subequal in size than anterior maxillary teeth (or alveoli)	significantly smaller than anterior maxillary teeth (or alveoli)	significantly larger than anterior maxillary teeth (or alveoli)
33	Terminal rosette of dentary, number of teeth (or alveoli)	terminal rosette absent	four teeth (or alveoli)	five teeth (or alveoli)
34	First dentary alveoli open	dorsally	anterodorsally, procumbent teeth
35	Mid-dentary teeth, inclination	pointing dorsally	pointing anterodorsally, procumbent
36	Dentary teeth, spacing	evenly spaced	anterior dentary teeth more closely appressed than those in middle and posterior parts of the tooth row
37	Palatal teeth on the pterygoid	present	absent
38	Mesial teeth, constriction between root and crown	absent	constriction weak, base of crown occupying more than 85% of largest crown width	constriction important, base of crown occupying 85% or less of largest crown width
39	Mesial teeth, constriction between root and crown along the tooth row	present in some teeth	present in all teeth
40	Mesial teeth, height of the largest crown (CH in centimetres) in subadults/adults	CH ≤ 1	1 < CH ≤ 6	CH > 6
41	Mesial teeth, labiolingual compression of the crown (CBR = CBW/CBL)	CBR < 0.5, lenticular and strongly labiolingually compressed	0.5<CBR ≤ 0.75, oval to lenticular	weak, 0.75 < CBR < 1.2, tooth subcircular	CBR ≥ 1.2, teeth labiolingually elongated
42	Mesial teeth, baso-apical elongation of the crown (CHR = CH/CBL)	strongly elongated, CHR > 3	important, 2.5 < CHR ≤ 3	normal, 2 < CHR ≤ 2.5	weak, CHR ≤ 2
43	Mesial teeth, crown recurvature (lingually or distally)	present, strongly recurved	present, slightly recurved	absent, tooth crown straight and apex centrally positioned or almost centrally positioned
44	Mesial teeth, distal margin of the crown in lateral view	mainly concave	straight	mainly convex
45	Mesial teeth, outline of basal cross-section of the crown in the mesialmost tooth	subcircular, ovoid or elliptical	lanceolate, with acute and well-developed distal carina	Salinon shape, with labial margin convex and lingual margin biconcave	D-shaped or J-shaped, with lingual margins strongly convex and labial margin convex or sigmoid	U-shaped, with mesial and distal margin subparalell	lenticular, with acute and well-developed distal and mesial carinae
46	Mesial teeth, concave surface adjacent to the carina	absent	on the labial surface and adjacent to the distal carina	on the lingual surface and adjacent to both carinae	on the lingual surface and adjacent to the mesial carina only	on the lingual surface and adjacent to the distal carina only	one main concave surface centrally positioned on the lingual side of the crown
47	Mesial teeth, mesial carina	absent	present
48	Mesial teeth, mesial carina	non-serrated	serrated
49	Mesial teeth, distal carina	serrated	non-serrated
50	Mesial teeth, mesial carina	straight and centrally positioned on the crown	slightly twisted, curves onto the mesiolingual surface	strongly twisted, curves onto the lingual surface	almost straight and strongly lingually deflected
51	Mesial teeth, mesial carina, and if serrated, mesial serration	terminates well-above the cervix	extends to the cervix or just above it	terminates well beneath the cervix
52	Mesial teeth, distal carina	centrally positioned or slightly displaced	strongly labially deflected
53	Mesial teeth, position of mesial carina on the crown in articulation in mesialmost teeth	facing mostly labially	facing mostly mesially	facing mostly lingually
54	Mesial teeth, position of distal carina on the crown in articulation in mesialmost teeth	facing mostly distally or labiodistally	facing mostly lingually
55	Mesial teeth, average number of denticles per five millimetres on mesial carina at two-thirds height of the crown (MCA) in subadults/adults	≥ 20	14-19	9-13	≤ 8
56	Mesial teeth, average number of mid-crown denticles per five millimetres on distal carina (DC) in subadults/adults	≥ 20	14-19	9-13	≤ 8
57	Mesial teeth, denticle size (except in embryos and hatchlings)	minute denticles, more than 250 denticles on the distal carina	normal in height, between 15 to 250 denticles on the distal carina	very larges denticles, less than 15 denticles on the distal carina
58	Mesial teeth, denticles on mesial carina	rounded and symmetrically convex	rounded and asymmetrically convex	strongly hooked/pointed, denticles with a tip pointing apically
59	Mesial teeth, denticles on distal carina	rounded and symmetrically convex	rounded and asymmetrically convex	strongly hooked/pointed, denticles with a tip pointing apically
60	Mesial teeth, size of mesial denticles relative to distal denticles (DSDI)	mesial and distal denticles of same size, 0.8 < DSDI <1.2	mesial denticles larger than distal ones, DSDI < 0.8	distal denticles larger than mesial ones, DSDI > 1.2
61	Mesial teeth, denticles contiguous over tip or very close to the apex	present	absent
62	Mesial teeth, interdenticular sulci	absent	present, short	present, long and well-developed
63	Mesial teeth, flutes (i.e., subparallel longitudinal grooves separated by acute ridges) on the crown	absent	present on the lingual surface only	present on both labial and lingual surfaces	present on the labial surface only
64	Mesial teeth, longitudinal groove on the labial and/or lingual side of the crown	absent	present, a single groove centrally positioned	present, a single groove mesially positioned
65	Mesial teeth, longitudinal ridge, different of flutes, on the lingual side of the crown	absent	present, a single ridge centrally positioned	present, more than one ridge
66	Mesial teeth, basal striations, different of flutes, on both lingual and labial sides of the crown	absent	present
67	Lateral teeth, constriction between root and crown	absent	constriction weak, base of crown base occupying more than 85% of largest crown width mesiodistally	constriction important, base of crown base occupying 85% or less of largest crown width mesiodistally
68	Lateral teeth, constriction between root and crown along the tooth row	present in some teeth	present in all teeth
69	Lateral teeth, height of the largest crown (CH in centimetres) in subadults/adults	CH ≤ 1	1 < CH ≤ 6	CH > 6
70	Lateral teeth, labiolingual compression of the crown (CBR = CBW/CBL)	important, CBR ≤ 0.5, tooth strongly flattened	normal, 0.5 < CBR ≤ 0.75	weak, CBR > 0.75, tooth incrassate or subcircular
71	Lateral teeth, baso-apical elongation of the crown (CHR = CH/CBL)	weak, CHR ≤ 1.5	normal, 1.5 < CHR ≤ 2.5	important, CHR > 2.5
72	Lateral teeth, distal margin of crown in lateral view	strongly concave	slightly concave, roughly straight, or straight, apex positioned at the same level as distal profile	convex, apex positioned mesial to mesial profile	sigmoid, basal half concave and apical half convex	sigmoid, basal half convex and apical half concave
73	Lateral teeth, mesial margin of crown in lateral view	strongly convex	slightly convex, almost straight
74	Lateral teeth, mesiodistal curvature of the labial surface of the crown at one third of the crown	convex	surface centrally positioned on the crown roughly flattened	surface centrally positioned on the crown concave, labial depression restricted to the crown base	surface centrally positioned on the crown concave, labial depression extends along the basal half of the crown or more apically
75	Lateral teeth, concave surface adjacent to carinae all along the crown	absent	present on labial surface and adjacent to distal carina	present on lingual surface and adjacent to distal carina	present on labial surface and adjacent to both mesial and distal carinae	present on lingual surface and adjacent to both mesial and distal carinae
76	Lateral teeth, outline of basal cross-section of the crown	subcircular	lenticular or lanceolate	elliptical or bean-shaped (i.e., longitudinal depression centrally positioned on one side only)	8-shaped (i.e., longitudinal depression centrally positioned on both lingual and labial margins)	Subrectangular
77	Lateral teeth, mesial carina	present	absent
78	Lateral teeth, mesial carina	serrated	non-serrated
79	Lateral teeth, distal carina	present	absent
80	Lateral teeth, distal carina	serrated	non-serrated
81	Lateral teeth, extension of mesial carina relative to distal carina	mesial carina extends at the same level or terminates more apically than the distal carina	mesial carina extends more basally than the distal carina
82	Lateral teeth, mesial carina, and if serrated, basalmost serration of the mesial carina	terminates around mid-height of crown or more apically	extends to base of crown or slightly above the cervix	terminates well beneath the cervix
83	Lateral teeth, twisted mesial carina in some crowns	absent, mesial carina centrally positioned on mesial margin or weakly curved lingually towards the base in all teeth	present, mesial carina strongly twisting onto the mesiolingual surface in some teeth
84	Lateral teeth, distal carina, and if serrated, basalmost serration of the distal carina	extends to the cervix or just above it	terminates well beneath the cervix	terminates well above the cervix
85	Lateral teeth, profile of the distal carina on the crown in distal view	straight or very slightly bowed	strongly bowed or sigmoid
86	Lateral teeth, position of distal carina on the crown in distal view	centrally positioned or slightly displaced, crown subsymmetrical	strongly labially deflected, crown asymmetrical
87	Lateral teeth, average number of denticles per five millimeters on mesial carina at two-thirds height of the crown (MCA) in subadults/adults:	≥ 30	16-29	9-15	≤ 8
88	Lateral teeth, average number of mid-crown denticles per five millimetres on distal carina (DC) in subadults/adults	≥ 30	16-29	9-15	≤ 8
89	Lateral teeth, denticle number on both mesial and distal carinae (except in embryos and hatchlings)	more than 250 denticles (minute denticles or very large number of denticles of normal size)	between 15 to 250 denticles (denticles of average size)	less than 15 denticles (very large denticles or very small number of small denticles)
90	Lateral teeth, shape of denticles on mesial carina in lateral view	symmetrically convex	asymmetrically convex	hooked/pointed
91	Lateral teeth, shape of denticles on distal carina in lateral view	symmetrically convex	asymmetrically convex	hooked/pointed
92	Lateral teeth, shape of mesial margin of rounded denticles on mesial carina in lateral view	parabolic	subrectangular, with flattened surface
93	Lateral teeth, shape of distal margin of rounded denticles on distal carina in lateral view	parabolic	subrectangular, with flattened surface	semi-circular
94	Lateral teeth, shape of denticles at two-thirds height of the crown (MC-MA) on mesial carina in lateral view	longer apicobasally than mesiodistally, vertical subrectangular	as long mediodistally as apicobasally, subquadrangular	longer mediodistally than apicobasally, horizontal subrectangular
95	Lateral teeth, shape of mid-crown denticles (DC) on distal carina in lateral view	as long mediodistally as apicobasally, subquadrangular	longer mediodistally than apicobasally, horizontal subrectangular	longer apicobasally than mesiodistally, vertical subrectangular
96	Lateral teeth, denticle size along the carinae	regular, gradual change in denticle size	irregular, sporadic change in denticle size
97	Lateral teeth, biconvex apical denticles (i.e., biconvex external margin of denticle) on mesial carina in lateral view	absent	present
98	Lateral teeth, orientation of mesiodistal axis of apical denticles on mesial carina in lateral view	perpendicular to mesial margin	inclined apically from mesial margin
99	Lateral teeth, orientation of mesiodistal axis of mid-crown denticles on distal carina in lateral view	perpendicular to distal margin	inclined apically from distal margin
100	Lateral teeth, average number of denticles on mesial carina	higher number of denticles basally than at the mid-crown	lower number of denticles basally than at the mid-crown	subequal number of denticles basally than at the mid-crown
101	Lateral teeth, average number of denticles on mesial carina	higher number of denticles apically than at the mid-crown	lower number of denticles apically than at the mid-crown	subequal number of denticles apically than at the mid-crown
102	Lateral teeth, average number of denticles on distal carina (except in embryos and hatchlings)	higher number of denticles basally than at the mid-crown	subequal or lower number of denticles basally than at the mid-crown
103	Lateral teeth, average number of denticles on distal carina	higher number of denticles apically than at the mid-crown	lower number of denticles apically than at the mid-crown	subequal number of denticles apically than at the mid-crown
104	Lateral teeth, size of mesial denticles relative to distal denticles (DSDI)	mesial and distal denticles of same size, 0.8 < DSDI <1.2	mesial denticles larger than distal ones, DSDI < 0.8	distal denticles larger than mesial ones, DSDI > 1.2
105	Lateral teeth, distal denticles on the apex	contiguous over tip, or very close to the apex	distal denticles disappear well beneath apex
106	Lateral teeth, interdenticular space between mid-crown denticles on the distal carina	narrow, less than one third of the denticle width	broad, more than one third of the denticle width
107	Lateral teeth, interdenticular sulci between apical denticles on the mesial carina	absent	present, short and poorly developed, shorter than proximodistal denticle height	present, long and well-developed, equal or longer than proximodistal denticle
108	Lateral teeth, interdenticular sulci between mid-crown denticles on the distal carina	absent	present, short and poorly developed, shorter than proximodistal denticle height	present, long and well-developed, equal or longer than proximodistal denticle
109	Lateral teeth, interdenticular sulci between basalmost denticles on the distal carina	absent	present, short and poorly developed, shorter than proximodistal denticle height	present, long and well-developed, equal or longer than proximodistal denticle
110	Lateral teeth, flutes (i.e., subparallel longitudinal grooves separated by acute ridges) on the crown	absent	present on the lingual surface	present on labial surface or both labial and lingual surfaces
111	Lateral teeth, average number of flutes on the crown	1-7	7-8	>8
112	Lateral teeth, large transversal undulations on the crown in some teeth	absent	present, tenuous and barely visible with light	present, pronounced and well visible with light
113	Lateral teeth, large transversal undulations on the crown in some teeth when present	just a few	numerous and closely packed
114	Lateral teeth, marginal undulations (i.e., short undulations adjacent to carinae) in some teeth	absent	present and short, the mesiodistal elongation is less than four times the space separating each undulations	present and elongated, the mesiodistal elongation is longer than four times the space separating each undulations
115	Lateral teeth, marginal undulations in some teeth	present and shallow, only visible with light	present and pronounced, well visible in lateral view
116	Lateral teeth, marginal undulations in some teeth	present only on the mesial side of the crown	present only on the distal side of the crown	present on both mesial and distal sides
117	Lateral teeth, marginal undulations in some teeth	present and mesio-distally oriented	present and diagonally oriented
118	Lateral teeth, longitudinal groove on the labial and/or lingual surface of the crown	absent	present, a single groove centrally positioned	present, a single groove adjacent to mesial carina	present, two grooves or more
119	Lateral teeth, elongated longitudinal and rounded ridge (differing from flutes) on the lingual surface of the crown	absent	present, a single ridge centrally positioned	present, two or three ridges	present, several fainted ridges
120	Enamel surface texture	smooth or irregular (non-oriented) texture	braided (oriented) texture not clearly visible with light	braided (oriented) texture clearly visible with or without light	deeply veined/anastomosed (oriented) texture
121	Coarse enamel surface texture	remains baso-apically/diagonally oriented or slightly curved basally close to the carinae	strongly curved basally close to the carinae
122	Enamel microstructure, enamel tubules	absent or rare	common only in basal unit layer (BUL) and/or inner potion of enamel	common and extend throughout entire enamel thickness	extremely common and forming an integral structural component of enamel
123	Enamel microstructure, predominant enamel type	parallel crystallites	basal unit layer (BUL)	columnar
124	Enamel microstructure, predominant enamel type, percentage of enamel thickness	≥ 75%	< 75%
125	Enamel microstructure, number of enamel types present in schmelzmuster	one	two	three	four
126	Enamel microstructure, number of different module types present in schmelzmuster	one	two
127	Enamel microstructure, boundary between first and second enamel types from the enamel-dentine junction (EDJ)	parallel to EDJ	jagged, varies in distance from EDJ
128	Enamel microstructure, boundary between second and third enamel types from the EDJ	parallel to EDJ	jagged, varies in distance from EDJ
129	Enamel microstructure, basal unit layer (BUL)	present	absent
130	Enamel microstructure, basal unit layer (BUL)	poorly developed	well-developed, with distinct planes of separation between adjacent units
131	Enamel microstructure, basal unit layer (BUL), maximum unit diameter	< 10 µm	≥ 10 µm
132	Enamel microstructure, basal unit layer (BUL)	< 25% of total enamel thickness	25-50% of total enamel thickness	≥ 50% of enamel thickness
133	Enamel microstructure, incremental lines	absent	faint, poorly defined	well-defined
134	Enamel microstructure, incremental lines	present in one section of the schmelzmuster only	present in more than one section of the schmelzmuster but not throughout entire schmelzmuster	present throughout entire schmelzmuster
135	Enamel microstructure, columnar units closest to the EDJ, shape of units in cross-sections	polygons with sharp corners and more than 4 sides	subcircular or polygons with rounded corners and more than 4 sides	triangles and/or rectangles with sharp corners
136	Enamel microstructure, columnar units closest to the enamel-dentine junction (EDJ)	extend straight and unbroken to the OES or to within 20 µm below the OES	end, split, or are interrupter less than two-thirds of the distance from the EDJ to OES
137	Enamel microstructure, columnar units closest to the enamel-dentine junction (EDJ), maximum unit diameter	< 15 µm	≥ 15µm
138	Enamel microstructure, columnar units closest to the outer enamel surface (OES)	no dominant direction of orientation, planes of separations equally well-developed in all directions	distinct longitudinal orientation, planes of separation better developed in an apicobasal (longitudinal) direction
139	Enamel microstructure, ratio of thickest enamel type in schmelzmuster divided by second thickest enamel type	> 7	1.3 to 7	1 to 1.3
140	Root, shape in lateral view	with subparallel mesial and distal margins	with convex margins, root significantly larger than base crown
141	Root, distal shape in lateral view	broad	strongly tapered apically
142	Root, outline of mid-root in cross section	oval to subcircular	8-shape (i.e., longitudinal depression centrally positioned on both lingual and labial margins)	bean-shaped (i.e., longitudinal depression centrally positioned on one side only)
143	Root, form of the resorption pit in lingual view	deep and well-delimited depression	shallow concavity
144	Root, transversal undulations below the cervix in some crowns:	absent	present
145	Root, apicobasal height in lateral view	less than twice the apicobasal height of the crown	twice or more the apicobasal height of the crown
